# Supplementary material for: Sb2O3@Sb nanoparticles impregnated in N-doped carbon microcages for ultralong life and high-rate sodium ion batteries
Source: Royal Society of Chemistry journal article supplement (doi:10.1039/d1ta01930a), 2021-01-01
Supplement: d1ta01930a1.pdf [file d1ta01930a1.pdf]

## Supporting Information

### **Sb<sub>2</sub>O<sub>3</sub>@Sb Nanoparticles Impregnated in N-doped Carbon Microcages for Ultralong Life and High-Rate Sodium Ion Battery**

*Anding Xu<sup>a</sup>, Chuyun Huang<sup>a</sup>, Guilan Li<sup>a</sup>, Kaixiang Zou<sup>b</sup>, Hao Sun<sup>b</sup>, Lili Fu<sup>b</sup>, Jiahao Ju<sup>b</sup>,  
Yang Song<sup>b</sup>, Songping Wu<sup>\*b, e</sup>, Zhiguang Xu<sup>\*c</sup>, Yurong Yan<sup>\*a, d</sup>*

<sup>a</sup> School of Materials Science and Engineering, South China University of Technology, Guangzhou, 510641 (China)

<sup>b</sup> School of Chemistry and Chemical Engineering, South China University of Technology, Guangzhou, 510641 (China)

<sup>c</sup> Key Laboratory of Theoretical Chemistry of Environment, Ministry of Education, School of Chemistry & Environment, South China Normal University, Guangzhou, 510006 (China)

<sup>d</sup> Key Lab of Guangdong High Property & Functional Polymer Materials, Guangzhou 510640 (China)

<sup>e</sup> Guangdong Key Laboratory of Fuel Cell Technology, Guangzhou, 510641 (China)

\* Corresponding author, E-mail: [chwsp@scut.edu.cn](mailto:chwsp@scut.edu.cn), [yryan@scut.edu.cn](mailto:yryan@scut.edu.cn), [chzgxu@scnu.edu.cn](mailto:chzgxu@scnu.edu.cn)

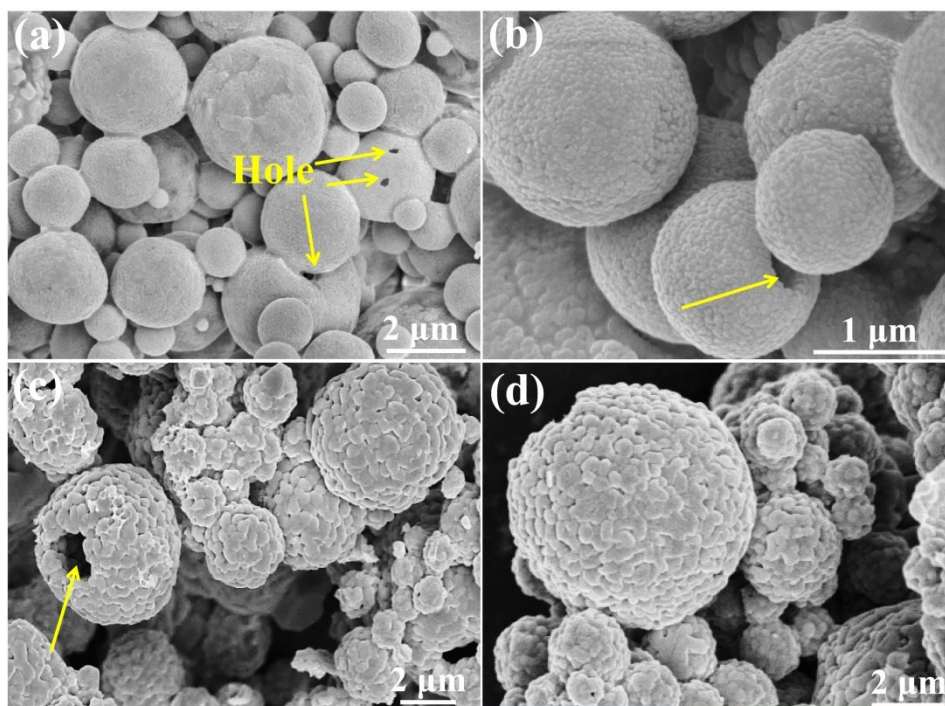

**Fig. S1** SEM images of (a-b) the precursor after spray drying; (c-d) the  $\text{Sb}_2\text{O}_3@\text{Sb}@\text{NC}@\text{KCl}$ .

Under the hot air turbulence of spray drying, the  $\text{Sb}_2\text{O}_3@\text{Sb}@\text{NC}$  precursor displayed a spherical and internally hollow structure (marked by yellow arrows) with a size range of 1-4  $\mu\text{m}$  mostly, which was consisted of numerous KCl nanocubes coated by carbon-containing layer (**Fig. S1a-b**). After annealing, the coating layer on the precursor surface was carbonized and transformed into rugged face (**Fig. S1c-d**). Simultaneously, the Sb source was pyrolyzed and partially reduced to yield  $\text{Sb}_2\text{O}_3@\text{Sb}$  heterojunction. Accordingly, the  $\text{Sb}_2\text{O}_3@\text{Sb}$  heterojunction was *in-situ* impregnated into N-doping carbon matrix.

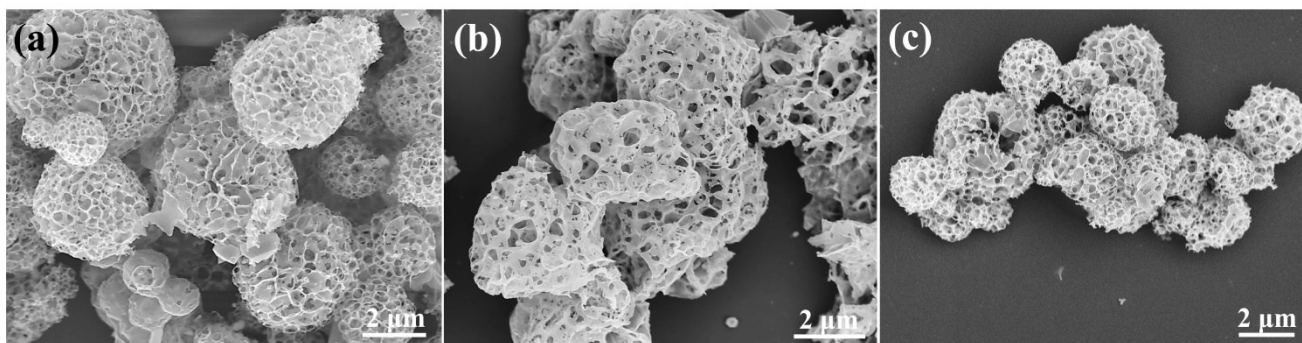

**Fig. S2** SEM images of (a)  $\text{Sb}_2\text{O}_3@\text{NC}$ , (b)  $\text{Sb}_2\text{O}_3@\text{Sb}@\text{C}$  and (c)  $\text{Sb}@\text{NC}$  composites.

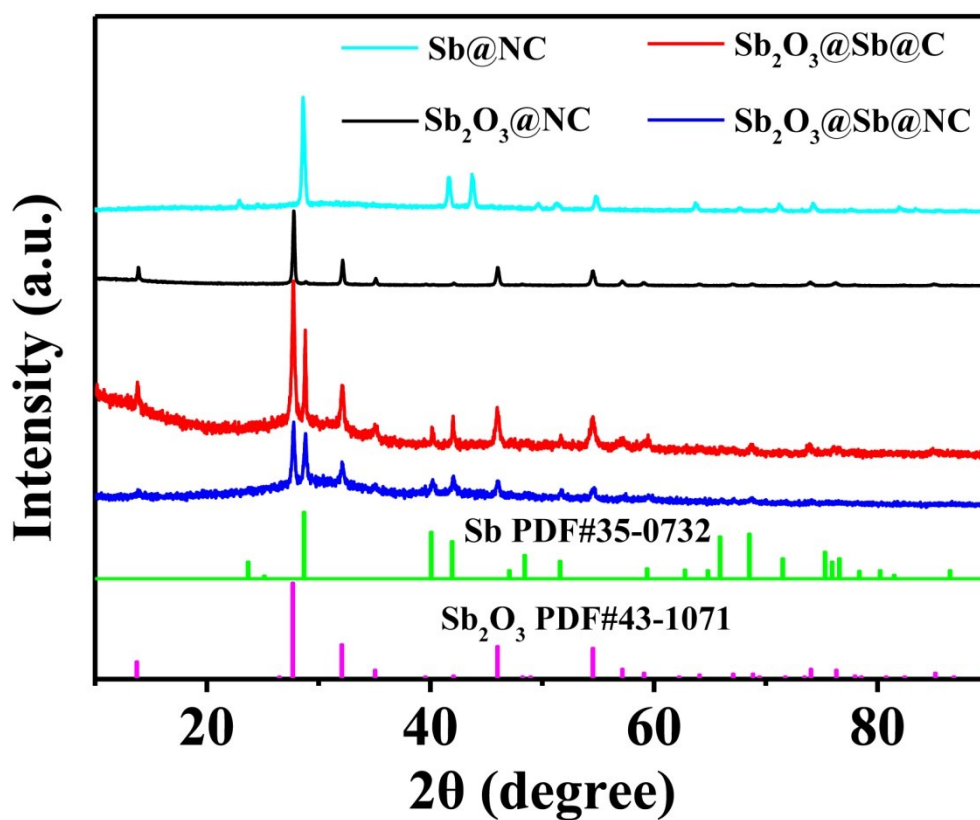

**Fig. S3** XRD patterns of  $\text{Sb}_2\text{O}_3@\text{NC}$ ,  $\text{Sb}@\text{NC}$ ,  $\text{Sb}_2\text{O}_3@\text{Sb}@\text{C}$ , and  $\text{Sb}_2\text{O}_3@\text{Sb}@\text{NC}$  composites.

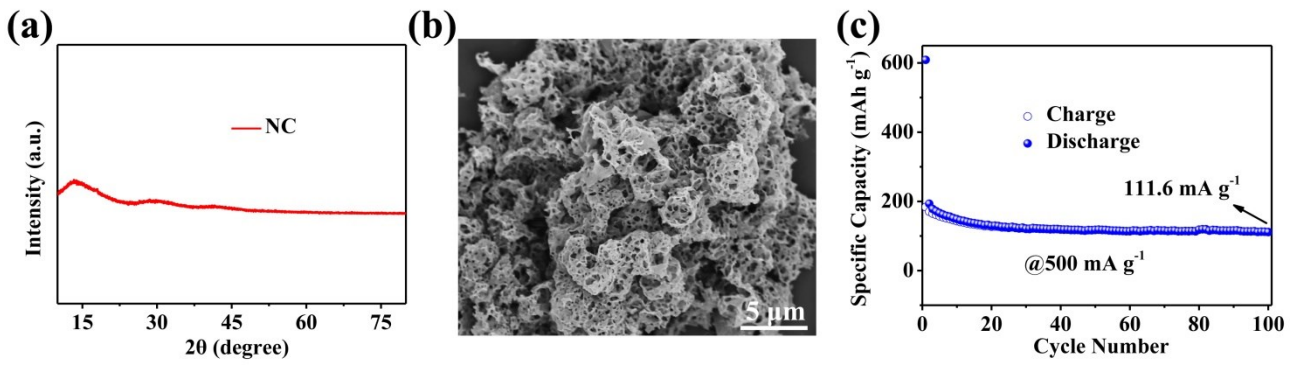

**Fig. S4** (a) XRD, (b) SEM and (c) cycling performance of NC.

The XRD indicated its amorphous structure of NC. The NC composites displayed a porous cracked sphere-like structure, which displayed stable capacity of  $111.6 \text{ mAh g}^{-1}$  under  $0.5 \text{ A g}^{-1}$ . The theoretical specific capacity of  $\text{Sb}_2\text{O}_3@\text{Sb}@\text{NC}$  composite could be calculated by the following equation:

$$\begin{aligned}
 \text{Specific Capacity} &= W_{\text{Sb}_2\text{O}_3} \times 1103 + W_{\text{Sb}} \times 660 + W_{\text{NC}} \times 111.6 \\
 &= 25.51\% \times 1103 + 20.96\% \times 660 + 53.53\% \times 111.6 \\
 &= 479.45 \text{ mAh g}^{-1}
 \end{aligned}$$

The practical specific capacity of  $477.87 \text{ mAh g}^{-1}$  for  $\text{Sb}_2\text{O}_3@\text{Sb}@\text{NC}$  at the fifth cycle under  $0.5 \text{ A g}^{-1}$  was very closed to  $479.45 \text{ mAh g}^{-1}$  (**Fig. 3b**), indicating the accuracy of above equation. Consequently, the capacity contribution  $\text{Sb}_2\text{O}_3$ , Sb, and NC in the  $\text{Sb}_2\text{O}_3@\text{Sb}@\text{NC}$  composite could be approximately calculated to 345.57, 121.37 and  $56.31 \text{ mAh g}^{-1}$ , respectively.

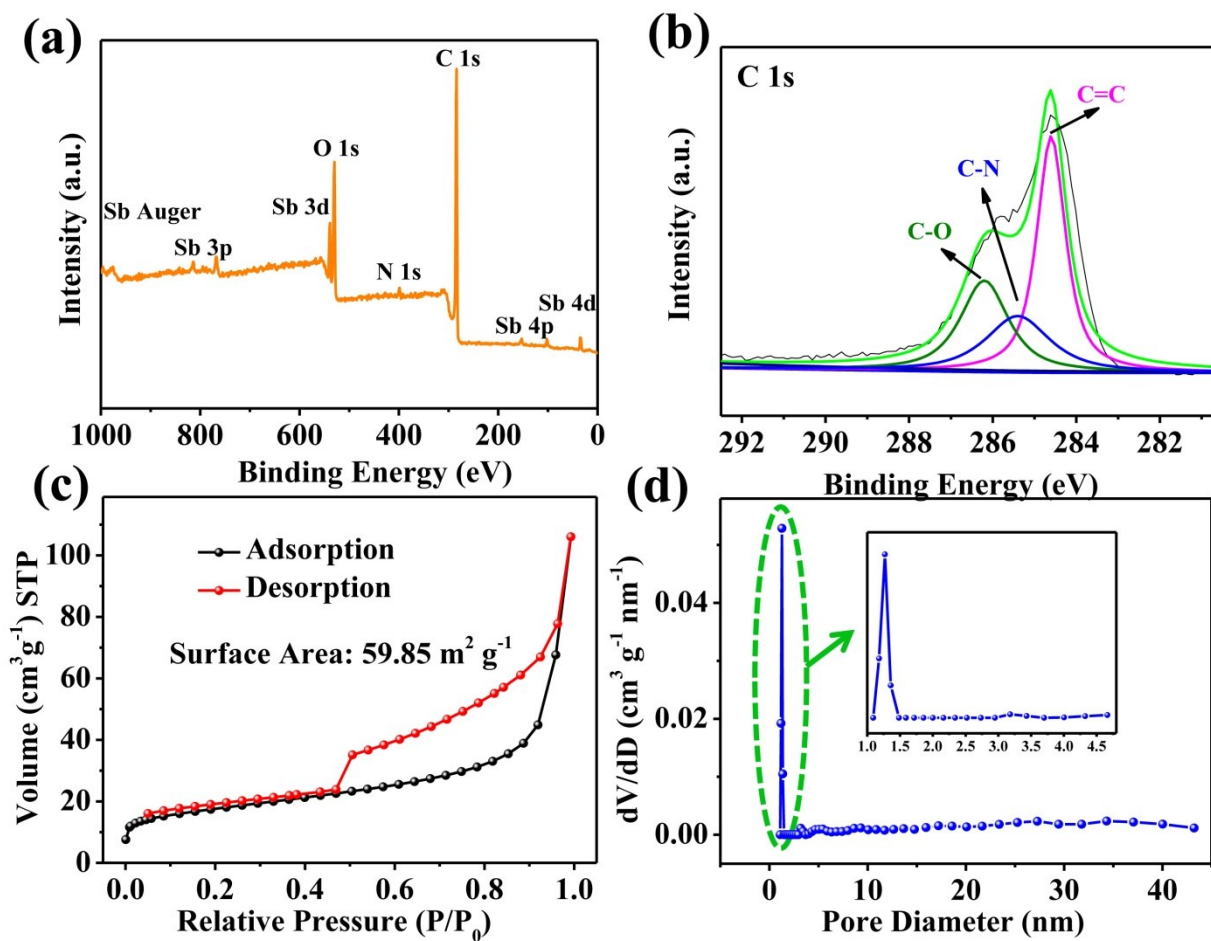

**Fig. S5** (a) Survey XPS spectrum, (b) C 1s spectrum, (c) nitrogen isotherm plots and (d) pore volume distribution curves of the  $\text{Sb}_2\text{O}_3@\text{Sb}@\text{NC}$  composite.

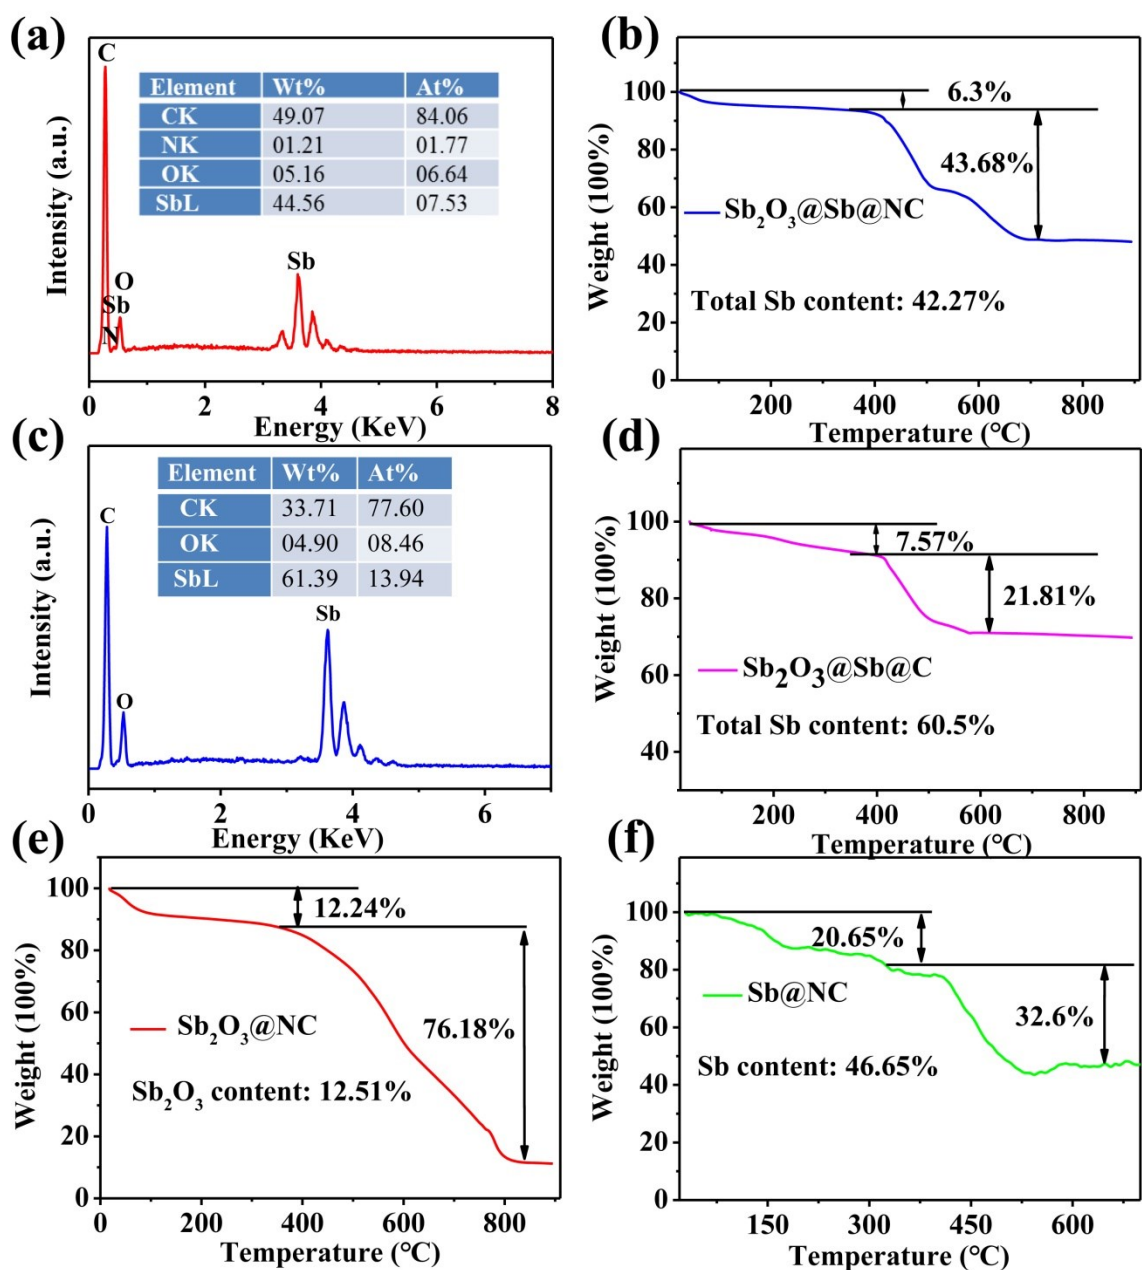

**Fig. S6** EDS analysis of (a)  $\text{Sb}_2\text{O}_3@\text{Sb}@\text{NC}$  and (c)  $\text{Sb}_2\text{O}_3@\text{Sb}@\text{C}$  composite; TG analysis of (b)  $\text{Sb}_2\text{O}_3@\text{Sb}@\text{NC}$ , (d)  $\text{Sb}_2\text{O}_3@\text{Sb}@\text{C}$ , (e)  $\text{Sb}_2\text{O}_3@\text{NC}$ , and (f)  $\text{Sb}@\text{NC}$  composites tested in the air atmosphere.

For the  $\text{Sb}_2\text{O}_3@\text{Sb}@\text{NC}$  and  $\text{Sb}_2\text{O}_3@\text{Sb}@\text{C}$  composite, TG analysis showed that the total Sb content in two materials was 42.27% and 60.5%, respectively. The weight ratio of  $\text{Sb}_2\text{O}_3:\text{Sb}$  could be quantitatively analyzed from their XRD intensity ratio because the mass fraction of specific phase is directly proportional to its diffraction peak intensity in a mixed phase. Therefore, The weight ratio of  $\text{Sb}_2\text{O}_3:\text{Sb}$  in the  $\text{Sb}_2\text{O}_3@\text{Sb}@\text{NC}$  and  $\text{Sb}_2\text{O}_3@\text{Sb}@\text{C}$  composites could be calculated

to be 1.217 and 1.513 from their diffraction peak intensity ratio. Consequently, the mass fraction of metallic Sb,  $\text{Sb}_2\text{O}_3$ , and N-doped carbon in the  $\text{Sb}_2\text{O}_3@\text{Sb}@\text{NC}$  composite could be calculated as 20.96, 25.51, 53.53wt%. In the  $\text{Sb}_2\text{O}_3@\text{Sb}@\text{C}$  composite, the content of Sb,  $\text{Sb}_2\text{O}_3$ , and C could be calculated as 26.73, 40.44 and 32.83 %, respectively. TG analysis of the total Sb and C content in two materials was very close to that of EDS analysis results, indicating the above analysis of material composition is relatively accurate.

For the  $\text{Sb}_2\text{O}_3@\text{NC}$  and  $\text{Sb}@\text{NC}$  composite, we can calculate the final product of  $\text{Sb}_2\text{O}_4$  after Sb and  $\text{Sb}_2\text{O}_3$  oxidation in the air to analyze the mass fraction of materials. As a result, the  $\text{Sb}_2\text{O}_3$  content in the  $\text{Sb}_2\text{O}_3@\text{NC}$  and the component of Sb in the  $\text{Sb}@\text{NC}$  composite could be calculated as 12.51% and 46.65%, respectively. The relatively lower  $\text{Sb}_2\text{O}_3$  content in the  $\text{Sb}_2\text{O}_3@\text{NC}$  composite might be mainly attributed to the lower degree of carbonization at 450 °C.

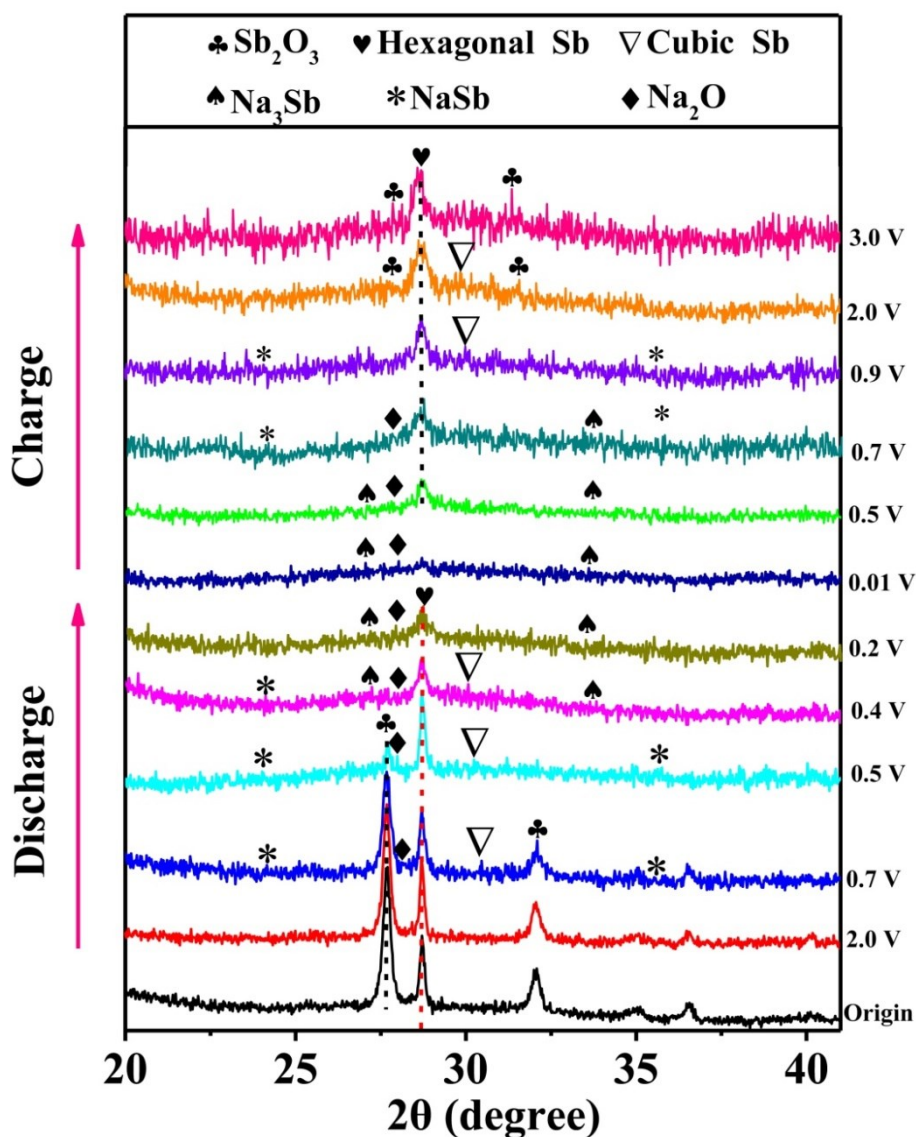

**Fig. S7** *Ex situ* XRD patterns of the  $\text{Sb}_2\text{O}_3@\text{Sb}@\text{NC}$  electrode at different discharge-charge stages for sodium ion batteries.

*Ex situ* XRD techniques were adopted to explore the storage mechanism of sodium for  $\text{Sb}_2\text{O}_3@\text{Sb}@\text{NC}$ . As shown in **Fig. S7**, some typical peaks at specific voltages were conducted to detect XRD patterns measured from  $20^\circ$  to  $41^\circ$ . The origin material owned good crystallinity with sharp peaks and well indexed to the  $\text{Sb}_2\text{O}_3$  (JCPDS No. 43-1071) and hexagonal Sb (JCPDS No. 35-0732). Upon the initial insertion of  $\text{Na}^+$ , the intensity of  $\text{Sb}_2\text{O}_3$  gradually decreased. And simultaneously, the peaks around  $27.95^\circ$  corresponding to the  $\text{Na}_2\text{O}$  (JCPDS No. 03-1074), the peaks of NaSb located at  $24.5^\circ$  and  $35.3^\circ$  (JCPDS No. 74-0801) and cubic Sb (JCPDS No. 17-0125)



were explicitly detected, indicating the emergence of conversion reaction of  $\text{Sb}_2\text{O}_3$  to form  $\text{Na}_2\text{O}$  and cubic Sb, and following alloy reaction of Sb. With the further discharge processing, the diffraction peaks of  $\text{Sb}_2\text{O}_3$  gradually disappeared, while the weak peaks at  $26.83^\circ$  were ready to sprout resulting from the formation  $\text{Na}_3\text{Sb}$  (JCPDS No. 04-0724). When the voltage decreased to 0.01V, the phase of original  $\text{Sb}_2\text{O}_3$  and Sb were not observed, the peaks of  $\text{Na}_3\text{Sb}$  and  $\text{Na}_2\text{O}$  could be still found.

At the charge process, the peak of Sb was gradually recovered due to the desodation at low potential. The peaks intensity of  $\text{Na}_3\text{Sb}$  phase and  $\text{Na}_2\text{O}$  piecemeally decreased and the peaks of NaSb were detected by degree. With the  $\text{Na}^+$  extraction continuing, the peak of NaSb was weaken and the cubic Sb reappeared and existed until finally disappeared from its characteristic position. At the fully-charged state, the peaks of original  $\text{Sb}_2\text{O}_3$  with (400) plane at  $32.01^\circ$  and hexagonal Sb were detected, suggesting that  $\text{Sb}_2\text{O}_3@\text{Sb}@NC$  owned the outstanding cyclic reversibility. The *ex situ* XRD results was consistent with the CV investigation.

From *ex situ* XRD results, the sodium storage mechanism for the  $\text{Sb}_2\text{O}_3@\text{Sb}@NC$  could be clearly demonstrated as follows:

Discharging reactions:

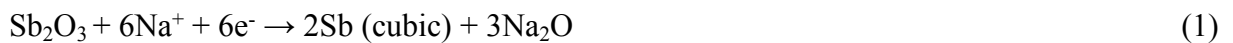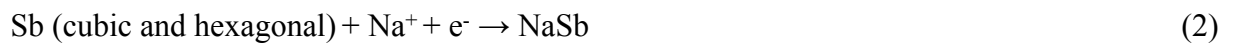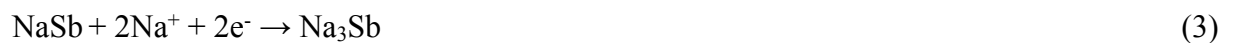

Charging reactions:

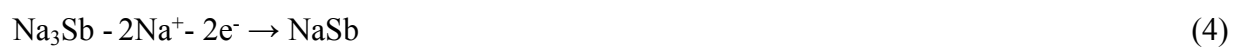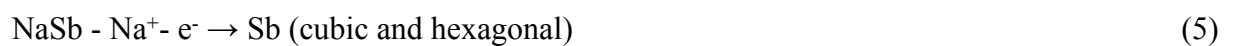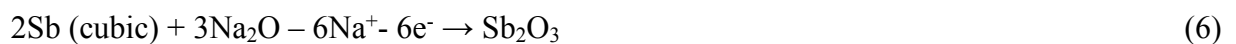

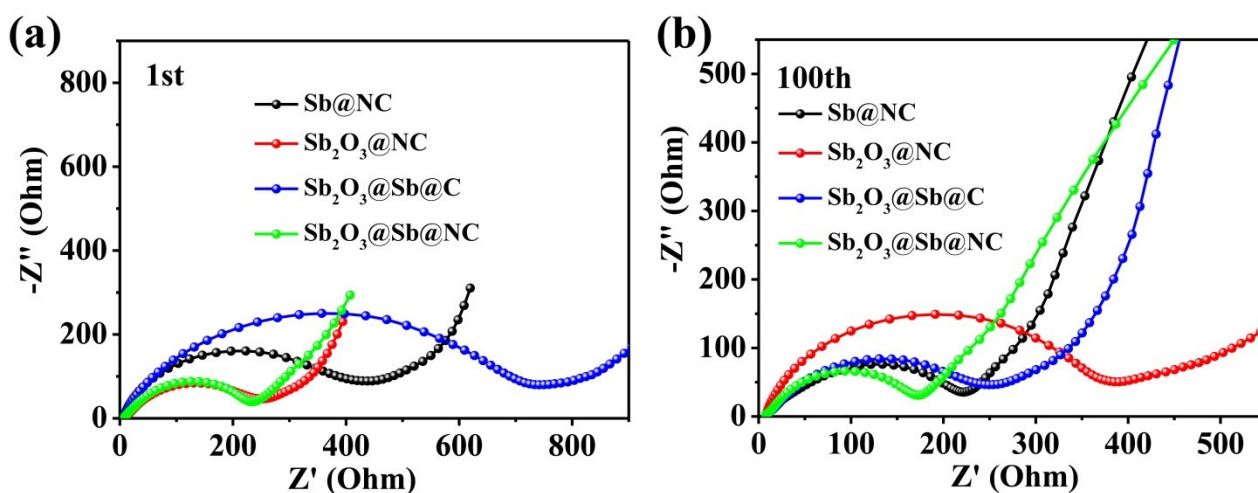

**Fig. S8** EIS profiles (a) at 1st and (b) 100th cycle for Sb<sub>2</sub>O<sub>3</sub>@Sb@NC, Sb@NC, Sb<sub>2</sub>O<sub>3</sub>@NC, Sb<sub>2</sub>O<sub>3</sub>@Sb@C under a current density of 10 A g<sup>-1</sup>.

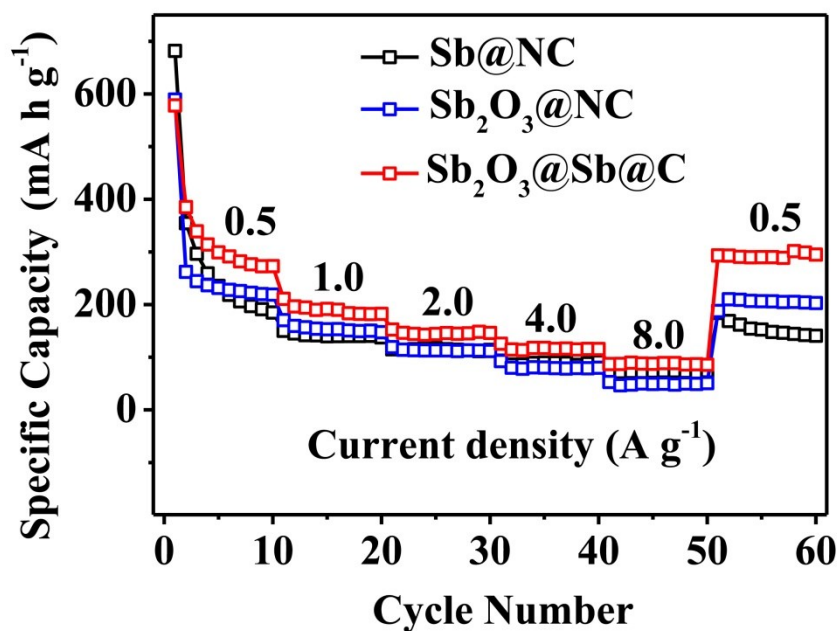

**Fig. S9** The rate performance of sodium ion batteries for Sb@NC, Sb<sub>2</sub>O<sub>3</sub>@NC, Sb<sub>2</sub>O<sub>3</sub>@Sb@C, under different current densities.

As a comparison, Sb@NC, Sb<sub>2</sub>O<sub>3</sub>@NC, Sb<sub>2</sub>O<sub>3</sub>@Sb@C composites displayed reversible capacities of 259.1, 141.0, 118.4, 89.0, 73.4, 147.9 mAh g<sup>-1</sup>; 262.1, 156.7, 112.8, 80.9, 50.1, 206.2 mAh g<sup>-1</sup>; and 385.1, 190.1, 146.0, 117.7, 89.7, 298.8 mAh g<sup>-1</sup> under 0.5, 1.0, 2.0, 4.0, 8.0, 0.5 A g<sup>-1</sup>, respectively. Remarkably, Sb<sub>2</sub>O<sub>3</sub>@Sb@NC showed a high reversible capacity of 175.1 mAh g<sup>-1</sup>

even the current density increased to ultrahigh rate of 20 A g<sup>-1</sup>, showing impressive enhanced kinetics and ultrahigh rate capability than the above control samples.

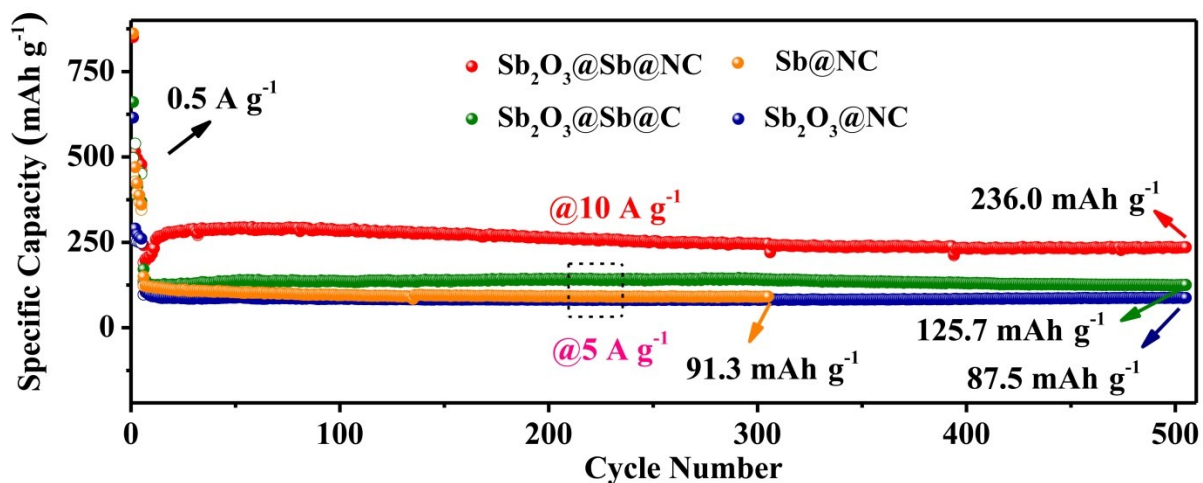

**Fig. S10** The cycling performance of sodium ion batteries for Sb<sub>2</sub>O<sub>3</sub>@NC, Sb<sub>2</sub>O<sub>3</sub>@Sb@C, Sb<sub>2</sub>O<sub>3</sub>@Sb@NC and Sb@NC composites under different current densities.

With a comparison of cycling performance, Sb<sub>2</sub>O<sub>3</sub>@NC, Sb<sub>2</sub>O<sub>3</sub>@Sb@C and Sb@NC composites delivered lower reversible capacities of only 87.5 mAh g<sup>-1</sup>, 125.7 mAh g<sup>-1</sup> at 505th cycle and 91.3 mAh g<sup>-1</sup> at 305th cycles under 5 A g<sup>-1</sup>, respectively. Impressively, Sb<sub>2</sub>O<sub>3</sub>@Sb@NC electrode could deliver a higher capacity of 236.0 mAh g<sup>-1</sup> at 505th cycle under ultra-high rate of 10 A g<sup>-1</sup>. These results indicated that the introduction of Sb<sub>2</sub>O<sub>3</sub>@Sb heterojunction and N-doping was beneficial for sodium storage performance under ultra-high current density, and also consistent with the data analyzed by DFT theory.

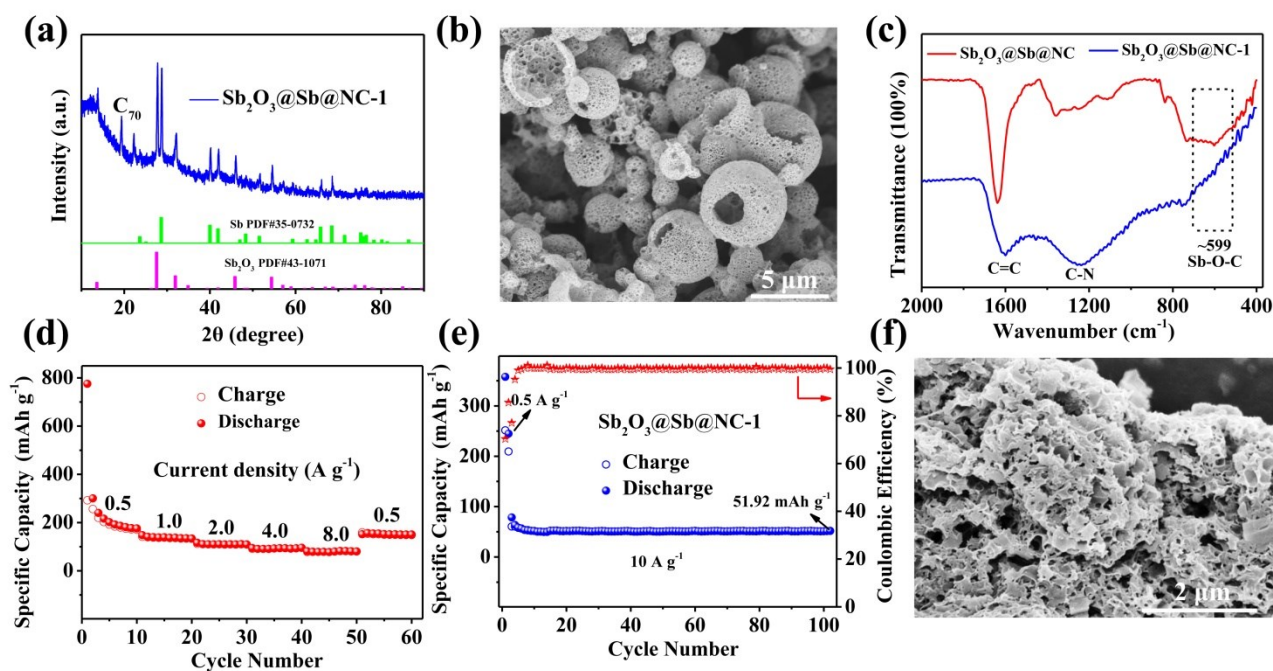

**Fig. S11** (a) XRD, (b) SEM, (c) FT-IR, (d) rate performance, (e) cycling performance of  $\text{Sb}_2\text{O}_3@\text{Sb}@\text{NC-1}$ , and (f) SEM of  $\text{Sb}_2\text{O}_3@\text{Sb}@\text{NC-1}$  after 100 cycles at the current density of 10  $\text{A g}^{-1}$ .

To investigate the influence of Sb-O-C bond on structure integrity and electrochemical performance,  $\text{Sb}_2\text{O}_3@\text{Sb}@\text{NC-1}$  was synthesized by adding the hard template of NaCl instead of KCl. As we can see,  $\text{Sb}_2\text{O}_3@\text{Sb}@\text{NC-1}$  reserved analogous structure and characteristic XRD peaks of  $\text{Sb}_2\text{O}_3@\text{Sb}@\text{NC}$ . However, the FT-IR spectrum of  $\text{Sb}_2\text{O}_3@\text{Sb}@\text{NC-1}$  could not observe the stretching vibration peak of Sb-O-C bond around  $599\text{ cm}^{-1}$ , illustrating that KCl is not only used as a template but also as an activator of forming Sb-O-C bond. Obviously,  $\text{Sb}_2\text{O}_3@\text{Sb}@\text{NC-1}$  displayed the poor rate performance lower output capacity compared with  $\text{Sb}_2\text{O}_3@\text{Sb}@\text{NC}$  (Fig.3), e.g.,  $78.7\text{ mAh g}^{-1}$  at  $8\text{ A g}^{-1}$  and  $51.92$  after 100 cycles at  $10\text{ A g}^{-1}$ . What's more, the completely broken materials of  $\text{Sb}_2\text{O}_3@\text{Sb}@\text{NC-1}$  after only 100 cycles at  $10\text{ A g}^{-1}$  indicated that it is difficult to maintain the structure integrity without the chemical coupling Sb-O-C bond.

On the basis of above discussion, there's no denying that the strong interfacial Sb-O-C bond

provided positive effect for enhanced cycle stability, rate performance and robust material structure integrity.

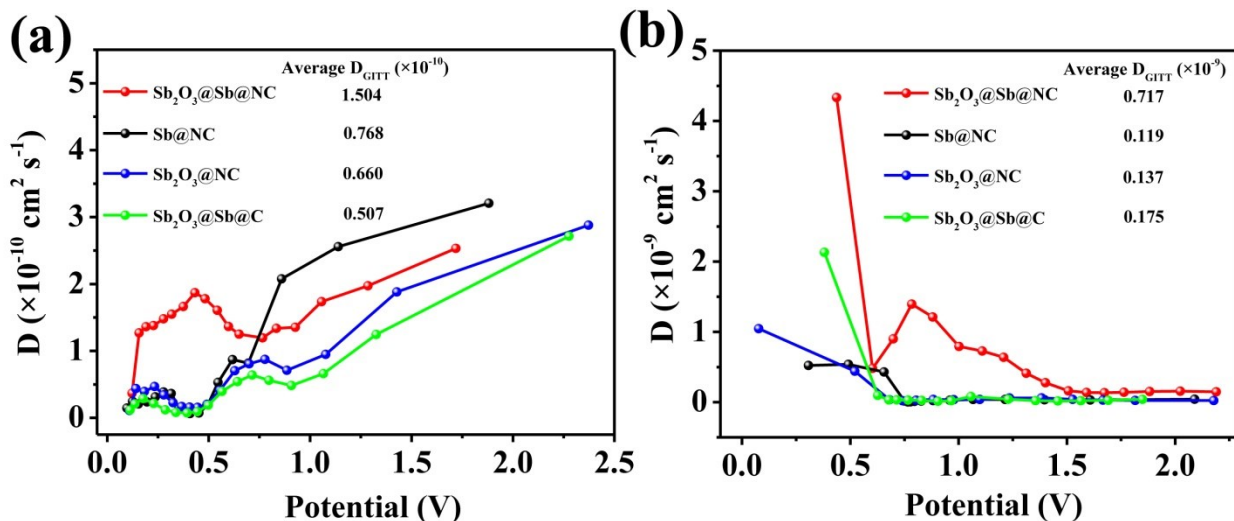

**Fig. S12** (a) Discharge-state and (b) charge-state diffusion coefficient values of  $\text{Sb}@\text{NC}$ ,  $\text{Sb}_2\text{O}_3@\text{NC}$ ,  $\text{Sb}_2\text{O}_3@\text{Sb}@\text{C}$  compared with  $\text{Sb}_2\text{O}_3@\text{Sb}@\text{NC}$  under  $500 \text{ mA g}^{-1}$  tested by GITT.

Galvanostatic intermittent titration technique (GITT) has been adopted to deeply check electrochemical kinetics of the  $\text{Sb}_2\text{O}_3@\text{Sb}@\text{NC}$  electrode in sodium and potassium ion batteries. During GITT process, the testing cells were discharged or charged at the current density of  $500 \text{ mA g}^{-1}$  for 2 minutes and then taken a relaxation of 10 minutes. The ion diffusion coefficient can be calculated by the simplified formula:

$$D_{\text{GITT}} = \frac{4L^2}{\pi\tau} \left( \frac{\Delta E_s}{\Delta E_\tau} \right)^2 \quad (\text{Equation 1})$$

where  $\tau$  is the current pulse time;  $L$  is the thickness of electrode materials;  $\Delta E_s$  is the steady-state voltage change after current pulse, and  $\Delta E_\tau$  represents the voltage change during the current pulse excluding the IR-drop.<sup>1,2</sup>

In the discharge state,  $\text{Sb}_2\text{O}_3@\text{Sb}@\text{NC}$ ,  $\text{Sb}@\text{NC}$ ,  $\text{Sb}_2\text{O}_3@\text{NC}$ , and  $\text{Sb}_2\text{O}_3@\text{Sb}@\text{C}$  owned average diffusion coefficient values of  $1.504 \times 10^{-10}$ ,  $0.768 \times 10^{-10}$ ,  $0.660 \times 10^{-10}$  and  $0.507 \times 10^{-10}$

$\text{cm}^2 \text{s}^{-1}$ , respectively. Furthermore,  $\text{Sb}_2\text{O}_3@\text{Sb}@\text{NC}$  also displayed overwhelmed preponderance on average diffusion coefficient values in the charge state than that of them. The above results revealed that the synergistic effect of introducing heterostructures and N-doping could enhance the  $\text{Na}^+$  diffusion coefficient and further improve the electrochemical performance.

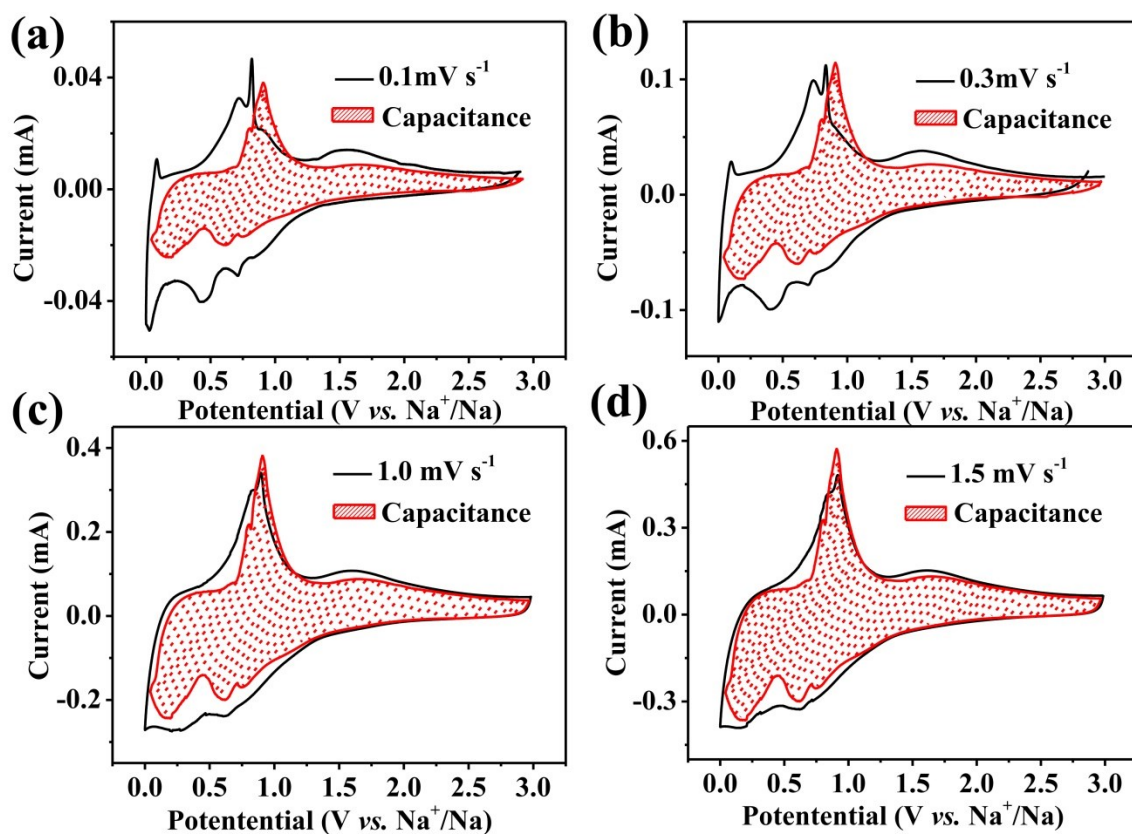

**Fig. S13** The accurately theoretical calculations on capacitive-effect contribution (red shadow area) to total sodium-storage capacity at a sweep rate of (a) 0.1, (b) 0.3, (c) 1.0 and (d)  $1.5 \text{ mV s}^{-1}$ .

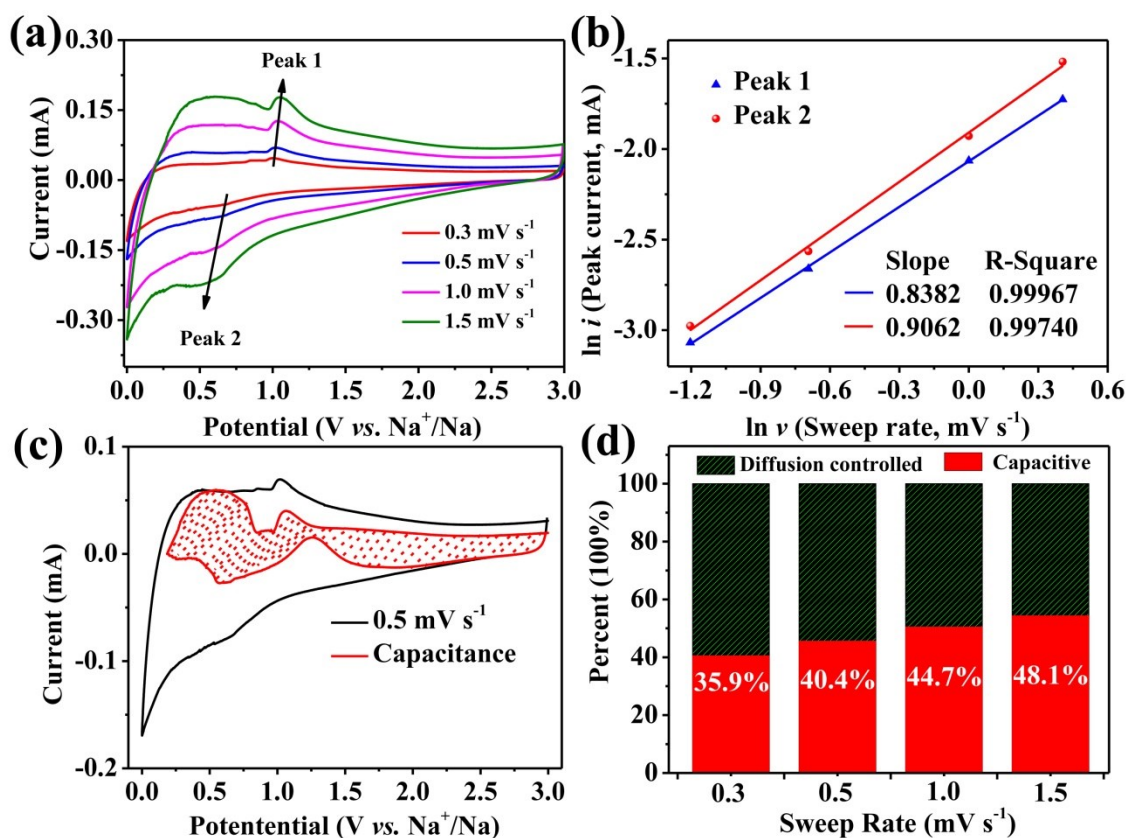

**Fig. S14** The accurately theoretical calculations on capacitive-effect contribution for Sb@NC composites. (a) CV curves with different sweep rates after 50 discharge/charge cycles at high current density of 10 A g<sup>-1</sup> for SIBs, (b) the line relationship of  $\ln(i_{\text{peak}})$  vs.  $\ln(v)$ , sweep rate) at peak 1-2, (c) the capacitive contribution to total sodium-storage capacity (shadow area) at a sweep rate of 0.5 mV s<sup>-1</sup>, (d) the percentage of capacitive contribution at different rates.

From above theoretical calculations of capacitive effect, the pseudocapacitance behavior during cycling in Sb@NC composites was partially contributed to total capacity. However, when the Sb<sub>2</sub>O<sub>3</sub> was introduced into Sb@NC to form Sb<sub>2</sub>O<sub>3</sub>@Sb@NC, the capacitive contribution of Sb<sub>2</sub>O<sub>3</sub>@Sb@NC was very higher than that Sb@NC, *e.g.*, 73.8% vs. 40.4% at the scan rate of 0.5 mV s<sup>-1</sup>, implying that the solid-solid interface of Sb<sub>2</sub>O<sub>3</sub>@Sb could provide extra interfacial pseudocapacitance.

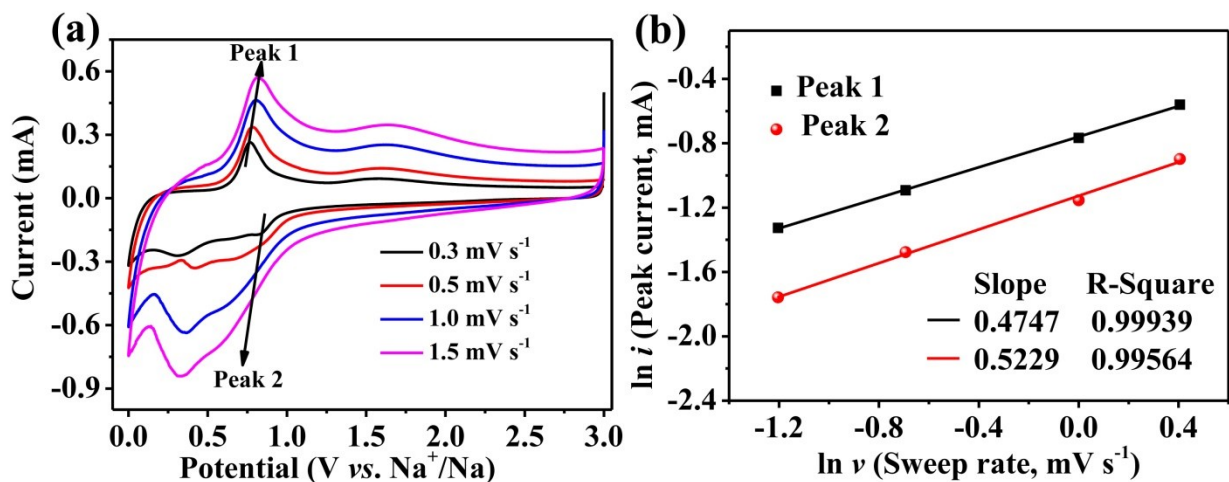

**Fig. S15** The accurately theoretical calculations on capacitive-effect contribution for  $\text{Sb}_2\text{O}_3@\text{NC}$  composites. (a) CV curves with different sweep rates after 50 discharge/charge cycles at high current density of  $10 \text{ A g}^{-1}$  for SIBs, (b) the line relationship of  $\ln(i, \text{ peak density})$  vs.  $\ln(v, \text{ sweep rate})$  at peak 1-2.

The capacitive-effect contribution could be assessed by the CV curves of  $\text{Sb}_2\text{O}_3@\text{NC}$  electrode at various sweep rates (Fig. S15a). The relation between the current ( $i$ ) and sweep rate ( $v$ ) could be described by the power equation:  $i=av^b$ , where  $a$  value and  $b$  value are adjustable quantities. The  $b$  value can be obtained from the slope of the fitted plot in the Fig. S15b (herein,  $b=0.5$ , extreme diffusion-controlled behavior;  $b=1$ , classic pseudocapacitance-controlled process).

The average line slope of peak 1 and peak 2 from the relationship of  $\ln i$  vs.  $\ln v$  could be calculated to be 0.4988, implicating the cycling process of  $\text{Sb}_2\text{O}_3@\text{NC}$  electrode is a type of extreme diffusion-controlled behavior. However, when the Sb was introduced into  $\text{Sb}_2\text{O}_3@\text{NC}$  to form  $\text{Sb}_2\text{O}_3@\text{Sb}@\text{NC}$ , the essential ascension of capacitive contribution for  $\text{Sb}_2\text{O}_3@\text{Sb}@\text{NC}$  was obvious, indicating that the solid-solid interface of  $\text{Sb}_2\text{O}_3@\text{Sb}$  could really introduce extra interfacial pseudocapacitance.



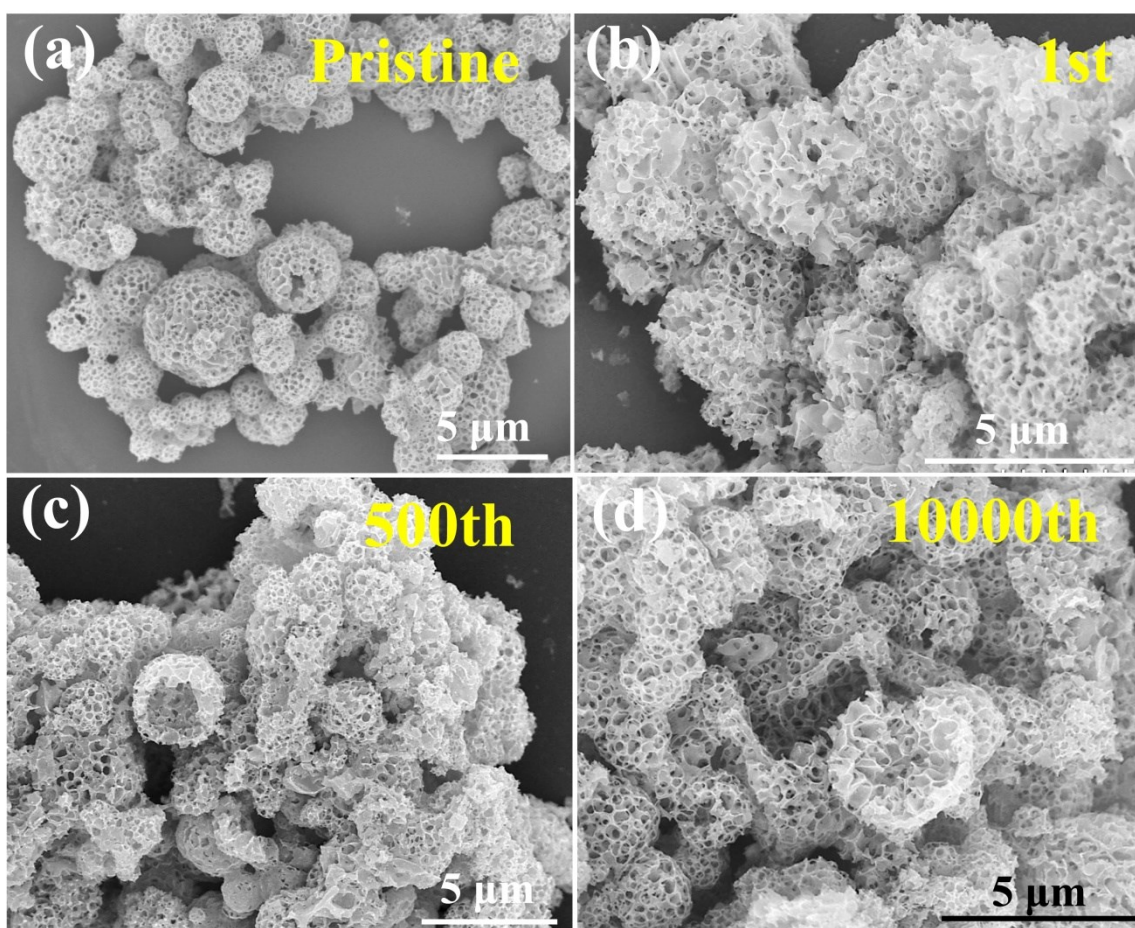

**Fig. S16** SEM images of  $\text{Sb}_2\text{O}_3@\text{Sb}@\text{NC}$  electrode at (a) pristine, (b) 1st, (c) 500th, and (d) 10000th cycle under a high rate of  $10 \text{ A g}^{-1}$ .

As shown in **Fig. S16**,  $\text{Sb}_2\text{O}_3@\text{Sb}@\text{NC}$  electrode owned enviable structural stability with well-maintained original morphology after various cycles even undergoing 10000 cycles at high rate of  $10 \text{ A g}^{-1}$ . The outstanding structure preserving might be ascribed to the tightly packaged active materials by porous carbon networks and the cohering strong chemical bond of Sb-O-C, ensuring the long-term cycling stability and ultrahigh rate performance.

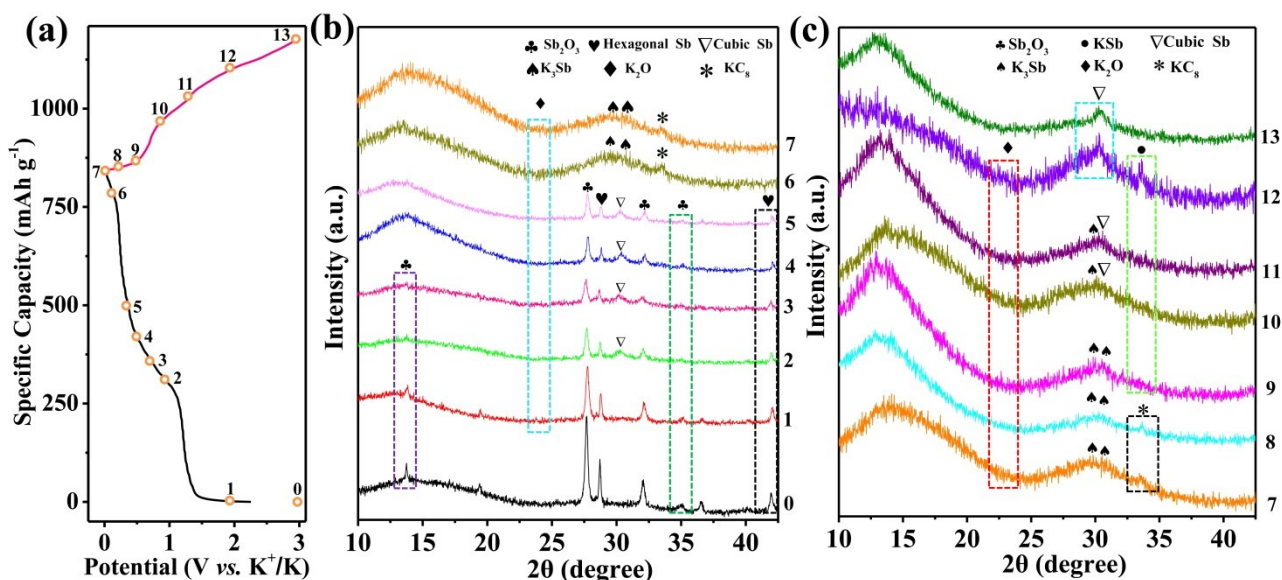

**Fig. S17.** (a) The first discharge/charge curves of Sb<sub>2</sub>O<sub>3</sub>@Sb@NC electrode at 0.1 A g<sup>-1</sup> for potassium ion battery, (b-c) *ex situ* XRD patterns of the Sb<sub>2</sub>O<sub>3</sub>@Sb@NC electrode at different discharge-charge stages.

Based on detail discuss of the superior electrochemical sodium storage performance, the investigation into potassium storage properties of the Sb<sub>2</sub>O<sub>3</sub>@Sb@NC composites also attracted our interest. Up to now, the potassium storage mechanism of antimony-oxide-based heterojunction was not clear. *Ex-situ* XRD techniques were adopted to explore the electrochemical mechanism of the Sb<sub>2</sub>O<sub>3</sub>@Sb@NC before deep discussions. As shown in Fig. S17a-c, some typical points at different voltages were adopted to detect XRD patterns measured from 10° to 42.5°. Before the discharge test, the origin material owned good crystallinity with sharp peaks and well indexed to the Sb<sub>2</sub>O<sub>3</sub> (JCPDS No. 43-1071) and hexagonal Sb (JCPDS No. 35-0732). Upon the initial insertion of K<sup>+</sup>, the intensity of Sb<sub>2</sub>O<sub>3</sub> and hexagonal Sb gradually decreased, and simultaneously, the peaks at around 23.9° and 30.38° respectively corresponding to the K<sub>2</sub>O (JCPDS No. 23-0493) and cubic Sb (JCPDS No. 17-0125) were explicitly detected, indicating the emergence of conversion reaction of Sb<sub>2</sub>O<sub>3</sub> to K<sub>2</sub>O and cubic Sb (Fig. S17b). With the further discharge processing, the diffraction peaks of Sb<sub>2</sub>O<sub>3</sub> and Sb gradually disappeared, while the weak peaks at 29.6° and 30.3° were ready to

sprout due to the gradual formation  $K_3Sb$  (JCPDS No. 04-0643). As the  $K^+$  insertion going on, the phase of  $KC_8$  was detected with a broad peak at  $33.6^\circ$ , illustrating that carbon matrix was also involved in the electrochemical reaction. At the charge process (Fig. 17c), the peaks of  $KC_8$  quickly vanished due to the depotassiation at low potential. Accompanying with it, the peak intensity of  $K_3Sb$  phase gradually decreased along with the appearance of  $KSb$  around  $34.1^\circ$  (JCPDS No.41-1289). With the  $K^+$  extraction continuing, the peak of  $K_3Sb$  was faded out and finally failed to find itself at aforementioned position in XRD pattern, with the reoccurrence of cubic  $Sb$  originated from following deep depotassiation. At the fully-charged state, the above peaks of  $KSb$ ,  $K_3Sb$  and  $K_2O$  eventually vanished, and no sharp peaks of original  $Sb_2O_3$  were detected, suggesting that the primary  $Sb_2O_3$  phase might have been converted into amorphous species. Instead, the relative higher peak of cubic  $Sb$  was clearly observed. Moreover, the XPS spectra of  $Sb\ 3d$  for the  $Sb_2O_3@Sb@NC$  in the full charge state confirmed the existence of  $Sb_2O_3$  phase (Fig. S18).

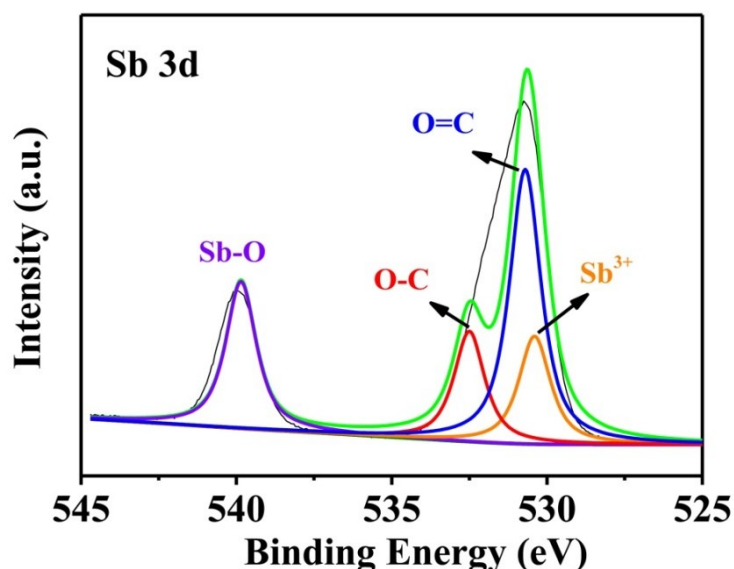

**Fig. S18** XPS spectra of  $Sb\ 3d$  for the  $Sb_2O_3@Sb@NC$  in the full charge state at  $100\text{ mA g}^{-1}$ .

**Fig. S19a** exhibited the initial three CV curves for potassiation/depotassiation of  $Sb_2O_3@Sb@NC$  electrode in the voltage range of  $0.01\text{-}3\text{ V}$  at the scan rate of  $0.1\text{ mV s}^{-1}$ . At the

first cycle, three reduction peaks at 1.13 V, 0.86 V, and 0.21 V could be observed. The first one was ascribed to the formation of SEI film and the insertion of  $K^+$  into  $Sb_2O_3$  to form cubic Sb and  $K_2O$ .<sup>3</sup> And other two peaks were assigned to the multistep formation of KSb and  $K_3Sb$ .<sup>4</sup> In following anodic sweeping, three anodic peaks at 0.66 V, 1.10 V and 1.72 V corresponded to the extraction of potassium ions from  $K_3Sb$ , KSb and the subsequent formation of  $Sb_2O_3$  by the electrochemical reaction between cubic Sb and  $K_2O$ ,<sup>3, 5, 6</sup> respectively. In the next cathodic scans, there aroused three fresh reduction peaks at 1.16 V, 0.64 V and 0.13 V, which always existed in subsequent cathodic scanning. Such three peaks could be attributed to the multistep insertion of potassium ions to form cubic Sb and  $K_2O$ , KSb and  $K_3Sb$ , respectively.<sup>7, 8</sup> A couple of redox peaks at 0.01V and  $\sim$ 0.15 V were associated with the  $K^+$  insertion/extraction for the carbon matrix.

Combining CV with *ex situ* XRD results, the potassium storage mechanism for the  $Sb_2O_3@Sb@NC$  is clearly demonstrated as follows, which contains multistep conversion reactions and alloying processes:

Discharging reactions:

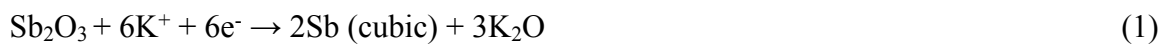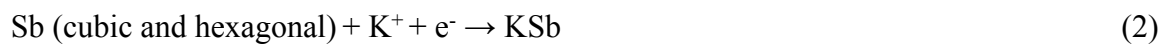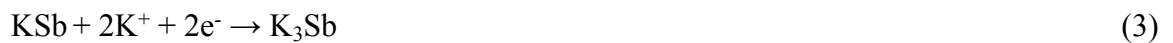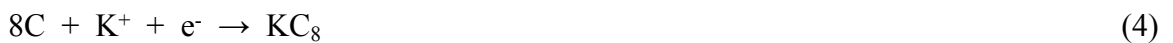

Charging reactions:

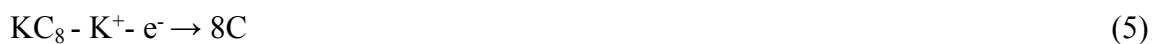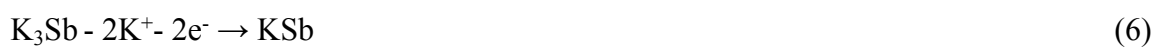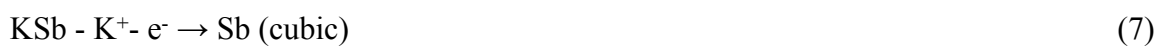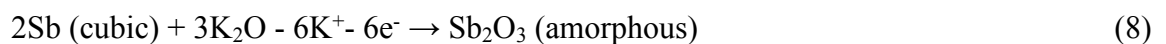

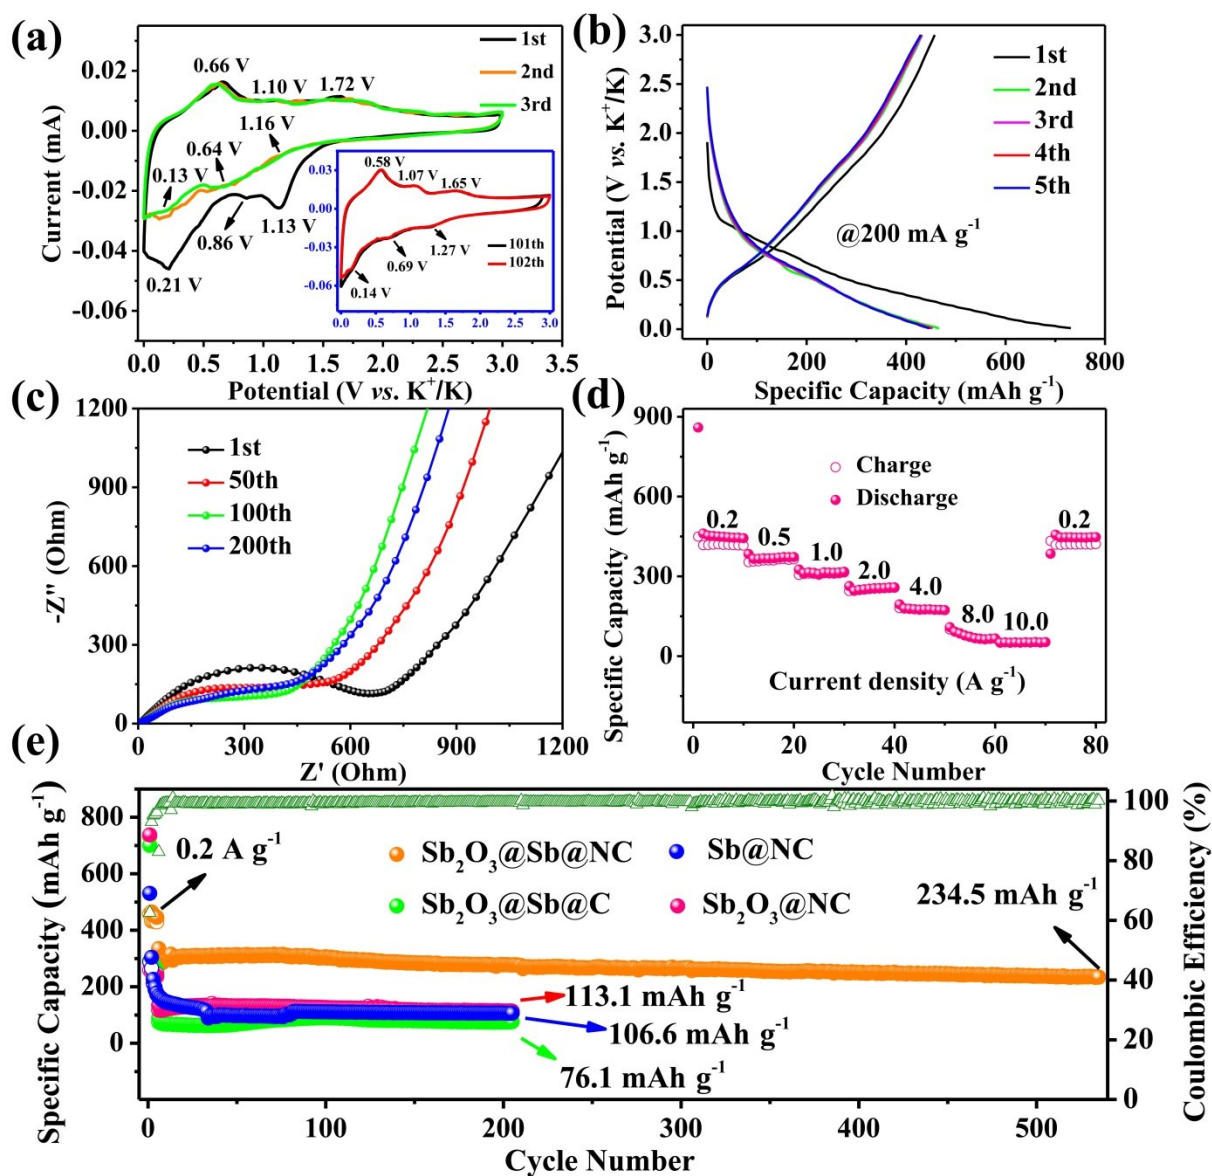

**Fig. S19** Electrochemical performance of  $\text{Sb}_2\text{O}_3@\text{Sb}@\text{NC}$  electrode for PIBs. (a) CV curves at a scan rate of  $0.1 \text{ mV s}^{-1}$  in the voltage range of 0.0–3.0 V, the inserted graph is the CV curves after 101 and 102 cycles at  $200 \text{ mA g}^{-1}$ ; (b) galvanostatic charge/discharge curves at  $200 \text{ mA g}^{-1}$ ; (c) EIS profiles after various cycles at a current density of  $2 \text{ A g}^{-1}$ ; (d) rate capability at different densities from 0.2 to  $10.0 \text{ A g}^{-1}$ ; (e) cycling performance at high current density of  $2 \text{ A g}^{-1}$ .

Importantly, after cycling more than 100 cycles, the cathodic peaks of CV curves shifted to 1.27 V, 0.69 V, and 0.14 V, while the corresponding anodic peaks shifted to 1.65 V, 1.07 V, and 0.58 V. The potential difference between redox couples became universally smaller after long-term

cycling, *e.g.*, 0.44 V at 100th cycle vs. 0.53 V at second cycle under low potential reaction, clearly indicating the attenuation of polarization effect with cycling number increasing. Such an undeniable fact demonstrated the appearance of enhanced kinetics and improved reversible capability upon potassiation/depotassiation. Meanwhile, the completely overlapped CV curves and the first five galvanostatic charge/discharge profiles at the current of 200 mA g<sup>-1</sup> (**Fig. S19b**) ulteriorly confirmed the stable cycling stability of the Sb<sub>2</sub>O<sub>3</sub>@Sb@NC composites.

The EIS profiles of the electrode under the current of 2 A g<sup>-1</sup> at different cycles were also investigated to explore the electrochemical kinetic and cycling capability (**Fig. S19c**). Similar to sodium ion battery, the Sb<sub>2</sub>O<sub>3</sub>@Sb@NC electrode also presented the gradually decreased charge-transfer resistance and increased line slope from 1st to 100th cycle, and simultaneously there is no distinct difference between 100th cycle and 200th cycle profile. All of which indicated the real exist of enhanced kinetic and improved reversible capability during cycling, which was consistent with the analysis of CV curves. Those features could lead to the ultra-fast K<sup>+</sup> insertion/extraction and superior cycling stability under high rate shock.

The rate capability of Sb<sub>2</sub>O<sub>3</sub>@Sb@NC electrode at various current densities was shown in **Fig. S19d**, which displayed excellent rate performance with high discharge capacities of 450.1, 383.9, 325.8, 263.5, 194.8, and 109.0 mAh g<sup>-1</sup>, at current densities of 0.2, 0.5, 1.0, 2.0, 4.0, 8.0 A g<sup>-1</sup>, respectively. Remarkably, the Sb<sub>2</sub>O<sub>3</sub>@Sb@NC electrode could maintain 53.0 mAh g<sup>-1</sup> even at the ultrahigh rate of 10.0 A g<sup>-1</sup>. When the current density recovered to 0.2 A g<sup>-1</sup>, the capacity could resumed to 456.8 mAh g<sup>-1</sup>, revealing admirable electrochemical stability of the Sb<sub>2</sub>O<sub>3</sub>@Sb@NC electrode under successively high rate impact.

In order to further detect the durability of the Sb<sub>2</sub>O<sub>3</sub>@Sb@NC electrode under high current density, a long-term galvanostatic cycling test was performed at the current density of 2 A g<sup>-1</sup>. As

presented in the **Fig. S19e**, the electrode afforded a high capacity of 445.8 mAh g<sup>-1</sup> at a current density of 0.2 A g<sup>-1</sup> after first 5 cycles. As to the following long-term cycling at the current density 2 A g<sup>-1</sup>, Sb<sub>2</sub>O<sub>3</sub>@Sb@NC electrode possessed a great capability and rendered an impressive cycling stability with highly reversible capacity of 234.5 mAh g<sup>-1</sup> after 530 cycles accompanied with high capacity retention of 82.1%. While the control samples, *i.e.*, Sb<sub>2</sub>O<sub>3</sub>@Sb@C, Sb<sub>2</sub>O<sub>3</sub>@NC and Sb@NC composites, only delivered lower capacities of 76.1 mAh g<sup>-1</sup>, 113.1 mAh g<sup>-1</sup> and 106.6 mAh g<sup>-1</sup> at 2 A g<sup>-1</sup> after 200 cycles, respectively. The robust cycling stability of Sb<sub>2</sub>O<sub>3</sub>@Sb@NC electrode was mainly attributed to the elaborately designed nature with the synergistic effect of Sb<sub>2</sub>O<sub>3</sub>@Sb heterojunction and N-doping and the strong chemical bond of Sb-O-C. The difference of electrochemical properties for sodium and potassium ion batteries was mainly attributed to the ionic radius and their difference of physicochemical property such as conductivity.

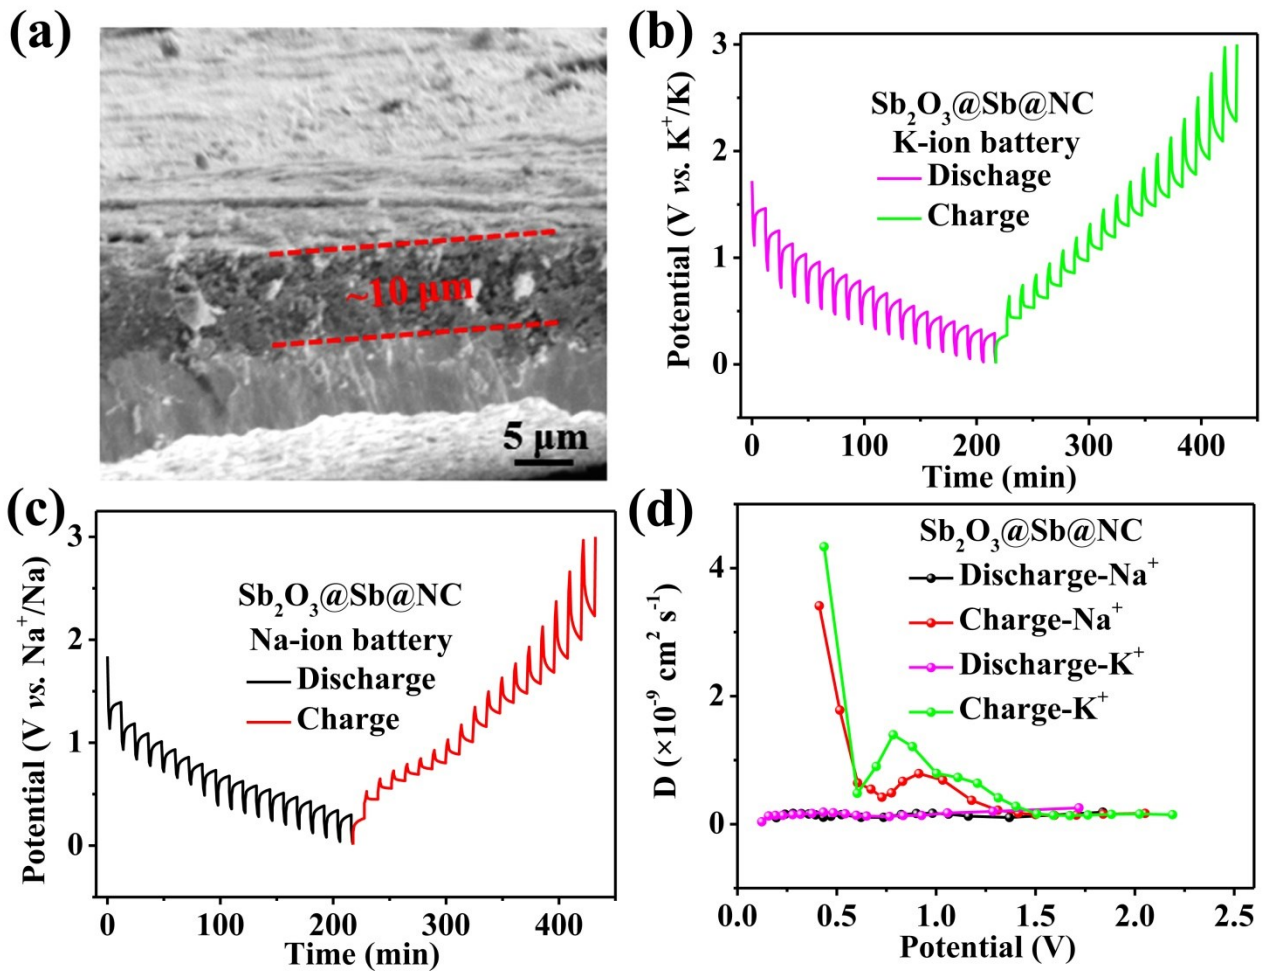

**Fig. S20** (a) The thickness of  $\text{Sb}_2\text{O}_3@\text{Sb}@\text{NC}$  composite on the copper foil. GITT curves of  $\text{Sb}_2\text{O}_3@\text{Sb}@\text{NC}$  electrode for (a) PIBs, (b) SIBs, and (c) diffusion coefficient values of  $\text{Na}^+$  and  $\text{K}^+$  calculated from GITT tests.

Normally, the dynamic parameters for  $\text{K}^+$  and  $\text{Na}^+$  are supposed to very significantly different in the identical electrode material because of their discrepancy of ion radius and molar mass.<sup>10</sup> We have tested the GITT curves of  $\text{Sb}_2\text{O}_3@\text{Sb}@\text{NC}$  composite for potassium and sodium ion battery by Equation 1 (**Fig. S20a-c**). Surprisingly, we could observe that the average diffusion coefficient for  $\text{K}^+$  and  $\text{Na}^+$  of the  $\text{Sb}_2\text{O}_3@\text{Sb}@\text{NC}$  electrode is almost close in the same state of charge (SOC), regardless of discharging or charging (**Fig. S20d**), e.g.,  $0.155 \times 10^{-9}$  for SIBs and  $0.174 \times 10^{-9} \text{ cm}^2 \text{ s}^{-1}$  for KIBs at the same discharge state of 1.06 V. The inspiring result indicated that the unique structure advantage of  $\text{Sb}_2\text{O}_3@\text{Sb}@\text{NC}$  composite make itself own enough rapid



electrochemical kinetics to get rid of the restriction of ion radius difference when ions shuttled through electroactive materials at a current density of  $500 \text{ mA g}^{-1}$ .

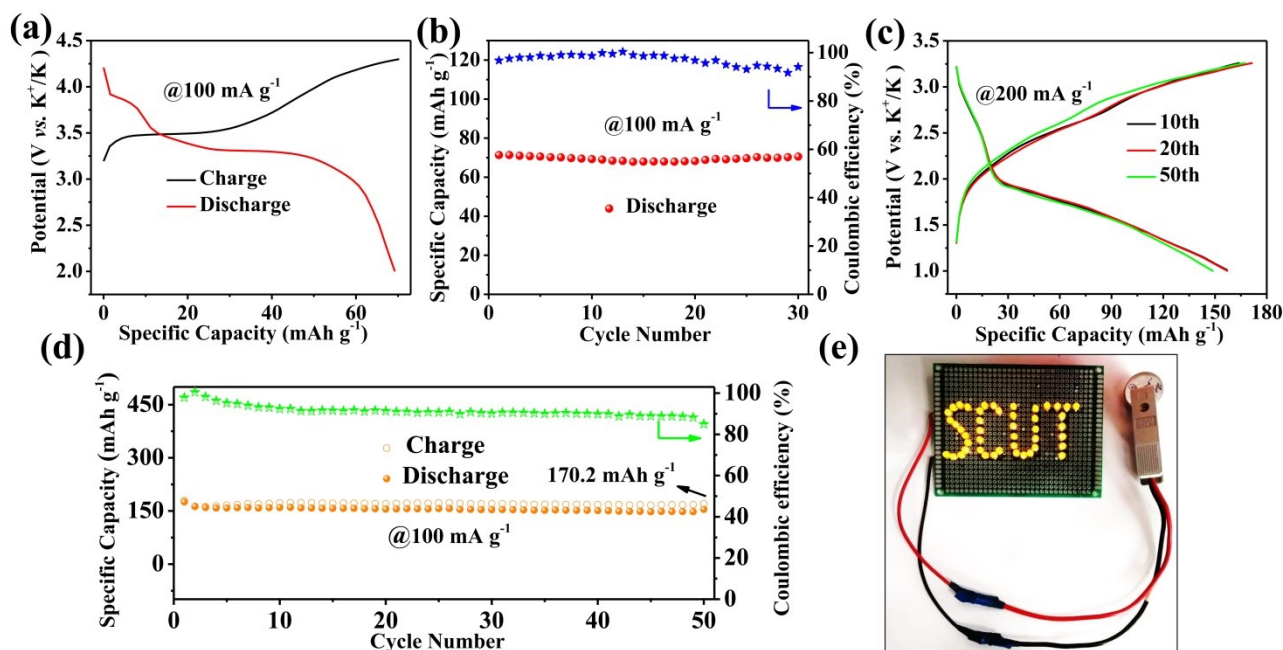

**Fig. S21** (a) The galvanostatic charge/discharge profiles and (b) cycling performance at a current density of  $100 \text{ mA g}^{-1}$  of prussian white analogues cathode. (c) The galvanostatic charge/discharge profiles, (d) cycling performance at  $100 \text{ mA g}^{-1}$  and the photograph of lighting a bulb for the  $\text{K}^+$  full cell.

In the full cell of PIB, prussian white analogues were adopted as cathodes, which owned a pair of plateau around 3.52/3.3 V (**Fig. S21a**) at current density of  $20 \text{ mA g}^{-1}$  and possessed stable output capacity of  $70.5 \text{ mAh g}^{-1}$  at  $100 \text{ mA g}^{-1}$  after 30 cycles (**Fig. S21b**). As the assembling full cell, the almost overlapped galvanostatic charge/discharge profiles demonstrated excellent stability with displaying a high capacity of  $170.2 \text{ mAh g}^{-1}$  at  $100 \text{ mA g}^{-1}$  after 50 cycles (**Fig. S21c-d**). And this full cell could lighten the light strip of “SCUT” constituted by yellow 47 LED bulbs, showing favorable prospect of practical application (**Fig. S21e**).

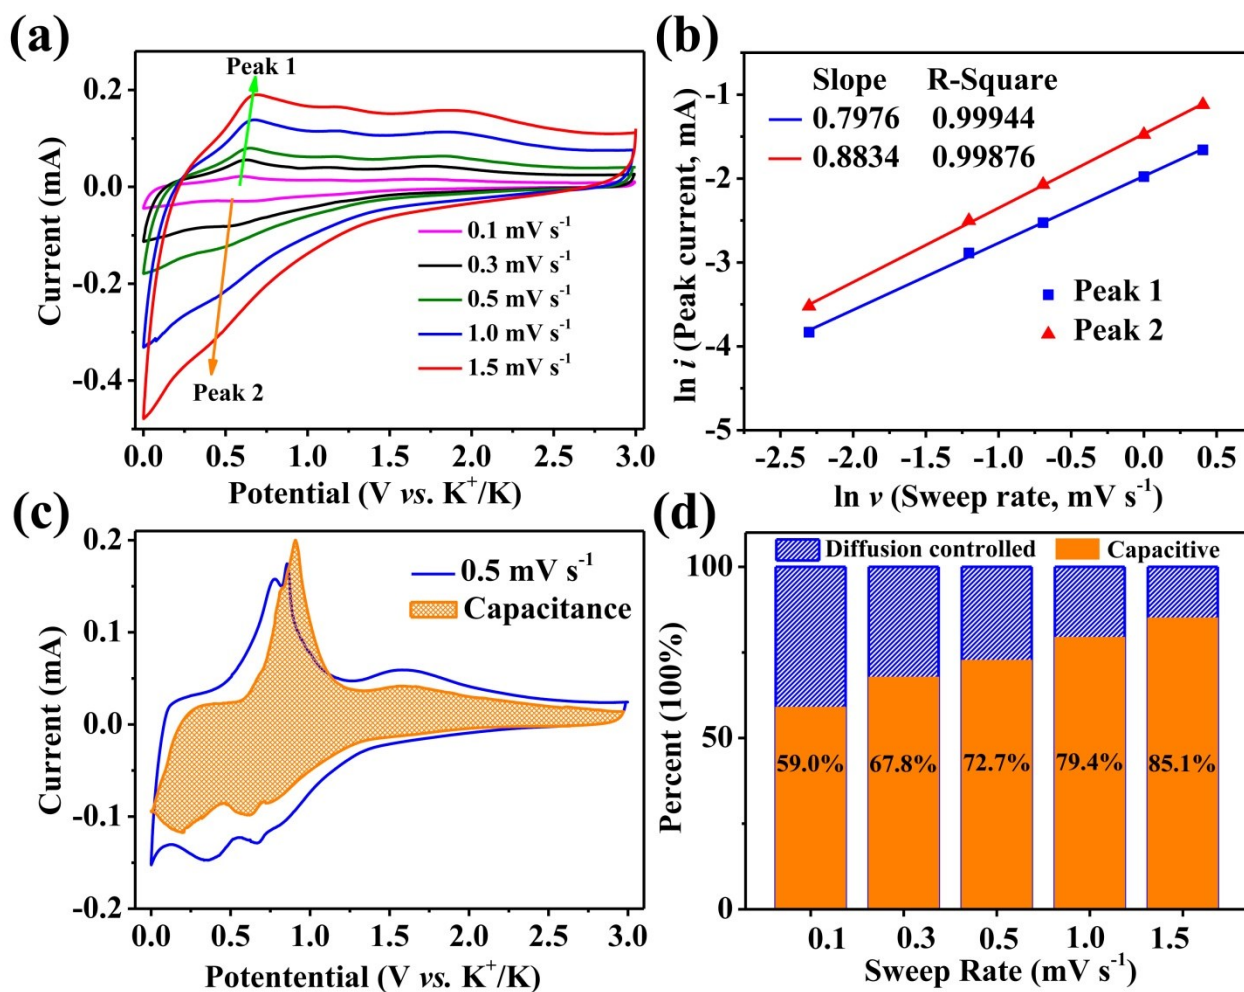

**Fig. S22** (a) CV curves with different sweep rates after 50 discharge/charge cycles at high current density of 10 A g<sup>-1</sup> for PIBs, (b) the line relationship of  $\ln(i, \text{peak density})$  vs.  $\ln(v, \text{sweep rate})$  at peak 1-2, (c) the capacitive contribution to total potassium-storage capacity (shadow area) at a sweep rate of 0.5 mV s<sup>-1</sup>, (d) the percentage of capacitive contribution at different rates.

**Table S1** Performance comparison of Sb-based materials between this work and literatures

| Material                                                                      | Synthetic method                                       | Long cycle performance (mAh g <sup>-1</sup> /A g <sup>-1</sup> /cycle number) | Rate charge capacity (mAh g <sup>-1</sup> )/ Current density (A g <sup>-1</sup> ) | Battery type     | Ref.               |
|-------------------------------------------------------------------------------|--------------------------------------------------------|-------------------------------------------------------------------------------|-----------------------------------------------------------------------------------|------------------|--------------------|
| <b>Sb<sub>2</sub>O<sub>3</sub>@Sb@NC</b>                                      | <b>spray drying &amp; hard template</b>                | <b>245.2/10/10000</b>                                                         | <b>175.1/20</b>                                                                   | <b>Sodium</b>    | <b>This work</b>   |
|                                                                               |                                                        |                                                                               | <b>192.5/16</b>                                                                   |                  |                    |
|                                                                               |                                                        |                                                                               | <b>109/8</b>                                                                      | <b>Potassium</b> |                    |
|                                                                               |                                                        | <b>234.5/2/530</b>                                                            | <b>53/10</b>                                                                      |                  |                    |
| Sb@C@TiO <sub>2</sub> triple-shell nanoboxes                                  | template-engaged galvanic replacement approach         | 193/1/4000                                                                    | 212/10                                                                            | Sodium           | <a href="#">11</a> |
| Sb/rGO-C                                                                      | spray pyrolysis                                        | 320/0.5/500                                                                   | 323/3                                                                             | Sodium           | <a href="#">12</a> |
| Sb nanosheets                                                                 | etching Li-Sb alloys at H <sub>2</sub> O-EtOH solution | 620/0.1/100                                                                   | 212/6.4                                                                           | Sodium           | <a href="#">13</a> |
| Sb <sub>2</sub> O <sub>3</sub> /Ti <sub>3</sub> C <sub>2</sub> T <sub>x</sub> | solution-phase method                                  | 472/0.1/100                                                                   | 295/2                                                                             | Sodium           | <a href="#">14</a> |
| Sb/ Sb <sub>2</sub> O <sub>3</sub> nanocomposite                              | air oxidization                                        | 540/0.66/180                                                                  | 412/10                                                                            | Sodium           | <a href="#">15</a> |
| Coral-like Sb <sub>2</sub> O <sub>3</sub> @Sb                                 | etching & air oxidization                              | 526.2/1/150                                                                   | 497.3/3                                                                           | Sodium           | <a href="#">16</a> |
| Sb <sub>2</sub> Se <sub>3</sub> @NC@rGO                                       | solvothermal & encapsulation method                    | 250/0.5/350                                                                   | 130/1                                                                             | Potassium        | <a href="#">17</a> |
| Sb <sub>2</sub> MoO <sub>6</sub> /rGO                                         | hydrothermal method                                    | 247/0.5/100                                                                   | 161/1                                                                             | Potassium        | <a href="#">18</a> |
| Sb@CNFs                                                                       | electro spinning strategy                              | 227/1/1000                                                                    | 121/1                                                                             | Potassium        | <a href="#">19</a> |
| 3DNP-Sb                                                                       | vacuum-distillation method                             | 510/0.1/50                                                                    | 265/0.5                                                                           | Potassium        | <a href="#">9</a>  |

## DFT evaluation

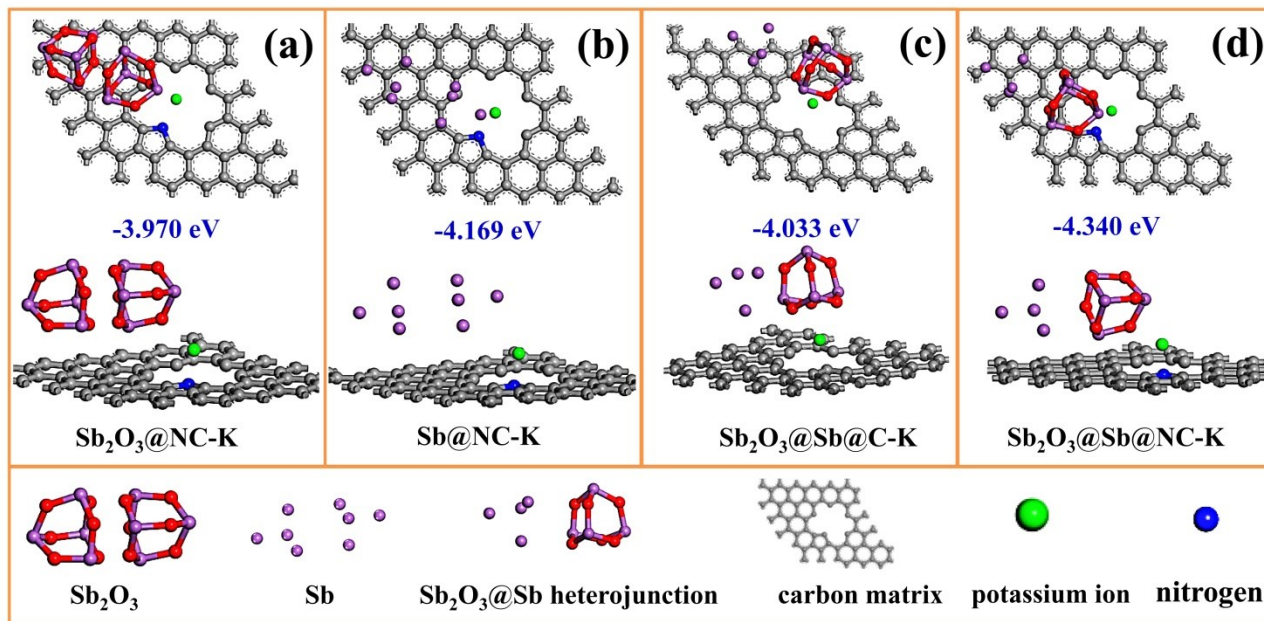

**Fig. S23** Theoretical simulations and adsorption energy of (a-d) the  $\text{Sb}_2\text{O}_3@\text{NC}$ ,  $\text{Sb}@\text{NC}$ ,  $\text{Sb}_2\text{O}_3@\text{Sb@C}$ , and  $\text{Sb}_2\text{O}_3@\text{Sb@NC}$  models for  $\text{K}^+$ .

For the PIBs, the  $\text{Sb}_2\text{O}_3@\text{NC-K}$  and  $\text{Sb}@\text{NC-K}$  possess the adsorption energies of -3.970 eV and -4.169 (Fig. S23a-b), whereas  $\text{Sb}_2\text{O}_3@\text{Sb@NC-K}$  (Fig. S23d) show the lower adsorption energy of -4.340 eV than that of  $\text{Sb}_2\text{O}_3@\text{NC-K}$  and  $\text{Sb}@\text{NC-K}$ . Obviously, the models of  $\text{Sb}_2\text{O}_3@\text{Sb@C-K}$  with  $\text{Sb}_2\text{O}_3@\text{Sb@NC-K}$  own the adsorption energies of -4.033 eV vs -4.340 eV (Fig. S23c-d), showing the positive influence of N doping for potassium storage. The relatively inferior  $\text{K}^+$  adsorption energy intervened by  $\text{Sb}_2\text{O}_3@\text{Sb}$  heterojunction and N doping is highly believed to ensure the excellent potassium storage. These theoretical analysis results were well consistent with the displaying electrochemical performance of  $\text{Sb}_2\text{O}_3@\text{Sb@NC}$  than that of  $\text{Sb}_2\text{O}_3@\text{NC}$ ,  $\text{Sb}@\text{NC}$  and  $\text{Sb}_2\text{O}_3@\text{Sb@C}$  for PIBs. According to the above discuss of DFT theory, the synergistic effect of  $\text{Sb}_2\text{O}_3@\text{Sb}$  heterojunction and N doping could effectively improve strong adsorption ability of  $\text{Na}^+$  and  $\text{K}^+$ , leading to the enhanced sodium and potassium storage performance at high current cycling process.

## References

1. Y. Zhang, P. X. Wang, Y. Y. Yin, N. N. Liu, N. Song, L. S. Fan, N. Q. Zhang and K. N. Sun, *Carbon*, 2019, **150**, 378-387.
2. P. Ge, S. Li, L. Xu, K. Zou, X. Gao, X. Cao, G. Zou, H. Hou and X. Ji, *Advanced Energy Materials*, 2019, **9**, 1803035.
3. Z. Yi, D. Fang, W. Zhang, J. Tian, S. Chen, J. Liang, N. Lin and Y. Qian, *CCS Chemistry*, 2020, **2**, 1306-1315.
4. Y. An, Y. Tian, L. Ci, S. Xiong, J. Feng and Y. Qian, *ACS nano*, 2018, **12**, 12932-12940.
5. X. Wu, Y. Chen, Z. Xing, C. W. K. Lam, S. S. Pang, W. Zhang and Z. Ju, *Advanced Energy Materials*, 2019, **9**, 1900343.
6. N. Cheng, J. G. Zhao, L. Fan, Z. M. Liu, S. H. Chen, H. B. Ding, X. Z. Yu, Z. G. Liu and B. G. Lu, *Chem Commun*, 2019, **55**, 12511-12514.
7. J. Li, N. Zhuang, J. Xie, X. Li, W. Zhuo, H. Wang, J. B. Na, X. Li, Y. Yamauchi and W. Mai, *Advanced Energy Materials*, 2019, **10**, 1903455.
8. X. Ge, S. Liu, M. Qiao, Y. Du, Y. Li, J. Bao and X. Zhou, *Angewandte Chemie*, 2019, **58**, 14578-14583.
9. T. Wu, C. Zhang, H. Hou, P. Ge, G. Zou, W. Xu, S. Li, Z. Huang, T. Guo, M. Jing and X. Ji, *Advanced Functional Materials*, 2018, **28**, 1705744.
10. A. Mahmood, S. Li, Z. Ali, H. Tabassum, B. Zhu, Z. Liang, W. Meng, W. Aftab, W. Guo, H. Zhang, M. Yousaf, S. Gao, R. Zou and Y. Zhao, *Advanced materials*, 2019, **31**, 1805430.
11. M. Kong, Y. Liu, B. Zhou, K. X. Yang, J. F. Tang, P. Zhang and W. H. Zhang, *Small*, 2020, DOI: Artn 2001976, 2001976.
12. J.-S. Park and Y. C. Kang, *Chemical Engineering Journal*, 2019, **373**, 227-237.
13. H. Li, K. Wang, M. Zhou, W. Li, H. Tao, R. Wang, S. Cheng and K. Jiang, *ACS nano*, 2019, **13**, 9533-9540.
14. X. Guo, X. Q. Xie, S. Choi, Y. F. Zhao, H. Liu, C. Y. Wang, S. Chang and G. X. Wang, *Journal of Materials Chemistry A*, 2017, **5**, 12445-12452.
15. J. Pan, N. Wang, Y. Zhou, X. Yang, W. Zhou, Y. Qian and J. Yang, *Nano Research*, 2017, **10**, 1794-1803.

16. J. Ye, G. Xia, Z. Zheng and C. Hu, *International Journal of Hydrogen Energy*, 2020, **45**, 9969-9978.
17. S. Wang, P. Xiong, X. Guo, J. Zhang, X. Gao, F. Zhang, X. Tang, P. H. L. Notten and G. Wang, *Advanced Functional Materials*, 2020, **30**, 2001588.
18. J. Wang, B. Wang, Z. Liu, L. Fan, Q. Zhang, H. Ding, L. Wang, H. Yang, X. Yu and B. Lu, *Adv Sci* 2019, **6**, 1900904.
19. H. W. Huang, J. W. Wang, X. F. Yang, R. Z. Hu, J. L. Liu, L. Zhang and M. Zhu, *Angewandte Chemie International Edition*, 2020, **59**, 14504-14510.
